# Supplementary material for: Gender disparities in the association between socio-demographics and non-communicable disease risk factors among adults with disabilities in Shanghai, China
Source: PeerJ. 2018 Mar 13;6:e4505. doi: 10.7717/peerj.4505 (PMC5855884; doi:10.7717/peerj.4505)
Supplement: Data S1 [file peerj-06-4505-s001.csv]

ID	age	age group	gender	disability type	disability severity	residence permit	education level	marital status	risk factor 1	risk factor 2	risk factor 3	risk factor 4
1	62	4	1	2	3	1	1	1	0	0	0	0
2	57	3	0	2	3	1	1	1	0	0	1	1
3	55	3	1	2	3	1	2	1	1	1	1	1
4	61	4	0	4	1	1	1	0	1	1	0	1
5	57	3	0	1	2	1	2	1	1	0	0	1
6	65	4	1	2	3	1	1	1	0	1	1	1
7	52	3	0	1	2	1	2	1	0	1	1	1
8	60	4	1	2	3	1	1	1	0	1	0	0
9	49	2	0	2	2	1	2	1	1	1	1	0
10	66	4	0	2	3	1	2	2	1	1	1	1
11	57	3	1	0	2	1	1	1	0	0	1	0
12	64	4	0	2	3	1	2	1	1	1	1	1
13	63	4	0	1	0	1	1	2	1	1	1	1
14	59	3	1	1	0	1	0	1	0	1	1	0
15	54	3	1	2	3	1	2	1	1	1	1	1
16	52	3	1	2	3	1	1	1	0	0	1	0
17	65	4	0	1	1	1	1	1	1	0	1	1
18	62	4	0	2	3	1	1	1	1	1	1	1
19	66	4	0	2	3	1	1	1	1	0	1	0
20	58	3	1	1	3	1	1	1	1	0	1	1
21	50	3	1	2	1	1	2	1	0	0	1	0
22	59	3	1	1	1	1	1	2	0	0	1	1
23	52	3	1	0	3	1	1	1	0	0	0	0
24	28	0	0	3	2	1	1	0	0	0	1	0
25	58	3	1	1	3	1	1	1	0	0	1	0
26	57	3	1	2	2	1	1	1	0	0	1	0
27	55	3	1	1	3	1	2	1	1	1	1	1
28	60	4	1	2	2	1	1	1	1	1	1	0
29	62	4	1	2	3	1	1	1	1	1	1	0
30	32	1	1	3	1	1	0	0	0	0	0	1
31	44	2	0	3	0	1	1	0	0	1	0	0
32	39	1	0	3	2	1	1	0	0	0	0	1
33	56	3	0	3	2	1	1	1	1	0	1	1
34	67	4	0	0	1	1	1	1	1	1	0	1
35	59	3	1	2	3	1	1	1	1	0	0	0
36	30	1	0	5	0	1	2	0	1	1	1	1
37	43	2	1	3	2	1	0	0	1	0	1	0
38	58	3	1	2	2	1	2	1	1	1	1	0
39	55	3	0	1	1	1	2	1	0	0	0	0
40	63	4	0	2	3	1	1	1	0	0	0	1
41	41	2	0	3	1	1	0	0	1	0	0	0
42	57	3	0	2	1	1	3	1	0	1	0	1
43	58	3	0	2	1	1	2	1	0	0	0	0
44	51	3	0	3	2	1	0	0	1	1	0	1
45	36	1	0	1	1	1	1	0	0	0	1	1
46	21	0	0	3	1	1	1	1	0	0	1	0
47	36	1	1	3	0	1	0	0	1	0	0	1
48	65	4	1	0	2	1	1	1	0	0	1	1
49	52	3	1	0	3	1	1	1	1	0	1	1
50	59	3	1	1	0	1	2	1	1	0	1	1
51	66	4	1	1	3	1	1	1	0	0	0	0
52	59	3	1	1	3	1	1	1	0	0	0	0
53	55	3	1	2	2	1	2	1	1	0	1	0
54	60	4	0	1	3	1	1	1	1	1	1	1
55	61	4	0	2	3	1	1	1	1	0	1	0
56	64	4	1	5	1	1	1	1	1	1	1	0
57	54	3	0	2	2	1	1	2	0	0	1	0
58	58	3	0	2	2	1	2	1	0	0	1	0
59	64	4	0	2	2	1	1	1	0	1	0	1
60	56	3	0	2	3	1	2	1	0	0	1	1
61	61	4	0	1	3	1	1	1	0	0	0	0
62	58	3	1	0	2	1	2	2	0	0	1	0
63	27	0	0	3	2	1	0	0	1	0	0	0
64	55	3	1	2	2	1	2	1	1	0	1	1
65	64	4	0	1	3	1	2	1	1	0	0	1
66	62	4	0	2	2	1	1	1	1	0	0	0
67	62	4	0	2	2	1	1	1	1	0	1	0
68	64	4	0	5	1	1	1	1	1	0	1	1
69	64	4	0	1	3	1	1	1	1	1	1	1
70	73	5	0	1	3	1	1	1	1	0	0	0
71	30	1	1	3	1	1	0	0	0	0	0	0
72	20	0	1	3	2	1	1	1	1	0	0	0
73	69	4	1	1	3	1	1	1	1	1	0	0
74	81	5	1	1	0	1	1	1	1	1	1	1
75	65	4	0	2	3	1	1	1	1	1	1	0
76	63	4	0	2	2	1	3	1	0	0	1	1
77	47	2	1	1	2	1	1	2	0	1	0	1
78	69	4	1	5	0	1	0	2	0	0	1	1
79	55	3	0	1	0	1	2	1	0	0	1	0
80	58	3	0	2	2	1	1	1	0	0	0	0
81	56	3	0	2	3	1	2	1	1	0	1	0
82	60	4	0	2	3	1	1	1	1	1	1	0
83	68	4	1	1	0	1	0	1	0	1	1	1
84	54	3	1	0	2	1	1	1	1	0	0	0
85	49	2	0	2	2	1	1	1	1	0	1	1
86	53	3	1	1	3	1	2	1	0	0	0	1
87	49	2	0	3	2	1	0	0	1	1	1	1
88	58	3	0	2	3	1	1	1	0	0	1	1
89	52	3	1	1	1	1	3	1	1	0	1	0
90	54	3	1	2	3	1	1	1	0	0	1	1
91	53	3	0	2	3	1	1	1	0	0	0	0
92	77	5	1	5	2	1	1	1	1	0	1	1
93	54	3	0	2	1	1	2	1	0	0	0	0
94	51	3	1	1	3	1	1	1	0	1	1	1
95	55	3	1	2	3	1	2	1	0	0	1	1
96	67	4	1	0	2	1	2	1	0	0	1	0
97	54	3	0	0	3	1	1	1	1	1	1	1
98	51	3	1	2	0	1	2	1	1	0	0	0
99	67	4	0	1	3	1	3	1	1	0	0	0
100	57	3	0	2	3	1	1	2	0	0	0	0
101	63	4	1	2	1	1	0	1	0	1	1	1
102	65	4	0	0	0	1	1	1	1	0	0	0
103	46	2	0	2	3	1	1	0	1	0	1	1
104	32	1	0	1	3	1	1	0	0	0	1	0
105	57	3	0	0	0	1	1	1	1	0	0	1
106	56	3	0	2	3	1	1	1	0	1	0	1
107	67	4	0	0	3	1	2	1	0	0	0	1
108	58	3	1	1	3	1	1	1	1	0	0	1
109	59	3	0	1	3	1	1	1	1	1	1	1
110	73	5	0	2	3	1	1	1	1	0	0	0
111	57	3	0	2	3	1	2	1	1	0	1	0
112	58	3	0	2	2	1	2	1	1	1	0	0
113	56	3	1	1	3	1	2	1	0	0	0	0
114	61	4	0	2	3	1	1	1	0	0	1	0
115	45	2	1	1	1	1	1	1	0	0	0	0
116	60	4	0	2	3	1	1	1	0	0	1	0
117	54	3	0	2	3	1	2	1	0	1	0	1
118	57	3	1	2	3	1	2	1	0	1	1	0
119	68	4	1	1	1	1	2	2	0	1	1	0
120	50	3	0	2	3	1	1	1	1	0	0	1
121	73	5	1	2	3	1	0	2	1	0	0	1
122	60	4	0	1	3	1	2	1	0	0	0	1
123	55	3	0	4	0	1	2	1	0	1	0	0
124	61	4	0	1	3	1	1	2	0	0	1	1
125	62	4	0	2	3	1	3	1	1	0	0	0
126	50	3	0	4	1	1	1	0	0	0	0	0
127	71	5	1	2	3	1	2	1	0	0	1	1
128	56	3	1	1	3	1	1	1	1	0	1	1
129	54	3	1	1	3	1	2	1	0	0	1	0
130	65	4	1	2	3	1	1	1	1	1	0	1
131	74	5	0	2	2	1	2	1	0	0	0	1
132	48	2	1	0	2	1	2	1	0	0	1	1
133	51	3	1	0	2	1	1	1	0	0	1	0
134	68	4	0	1	0	1	2	1	1	0	0	0
135	54	3	0	2	2	0	2	1	0	0	0	1
136	65	4	1	1	3	1	1	1	1	0	1	0
137	58	3	1	0	3	1	1	1	1	1	1	0
138	80	5	0	2	1	1	1	1	1	0	1	1
139	68	4	0	0	0	1	1	1	0	1	0	1
140	57	3	1	1	3	1	1	2	0	0	0	0
141	47	2	1	3	3	0	0	2	1	0	1	0
142	38	1	0	3	3	0	0	0	1	0	0	1
143	40	2	1	3	3	0	0	1	1	0	1	1
144	34	1	1	3	3	0	0	0	1	0	1	1
145	50	3	0	4	3	1	1	1	0	0	1	0
146	50	3	1	3	3	0	0	1	1	0	1	1
147	65	4	1	2	3	1	0	1	0	0	0	1
148	62	4	1	2	3	1	0	1	1	0	0	1
149	57	3	1	1	3	1	1	1	1	0	0	1
150	54	3	0	2	2	0	1	1	1	0	0	0
151	42	2	0	3	3	0	0	0	0	0	0	0
152	64	4	0	2	3	1	1	1	1	1	1	1
153	29	0	0	3	3	0	0	0	0	0	0	0
154	64	4	1	2	3	0	1	1	1	1	1	0
155	58	3	0	2	1	0	1	1	1	0	1	1
156	58	3	1	2	2	0	0	2	1	1	1	0
157	66	4	1	2	3	0	0	1	1	1	0	1
158	49	2	1	2	3	0	1	1	0	0	1	1
159	57	3	0	2	3	0	1	1	1	0	1	1
160	27	0	0	3	2	1	0	0	0	0	0	0
161	62	4	0	2	3	0	1	1	1	0	1	1
162	59	3	1	2	3	0	0	1	0	0	1	0
163	21	0	0	3	0	1	0	0	1	0	1	1
164	23	0	1	3	2	0	0	0	0	0	1	1
165	24	0	0	3	2	1	0	0	1	0	0	0
166	36	1	1	3	2	0	1	1	0	0	0	0
167	57	3	0	2	3	0	2	1	1	0	0	1
168	57	3	0	2	3	1	1	1	1	1	0	0
169	73	5	1	2	3	0	0	2	1	1	1	1
170	54	3	1	2	3	0	1	1	1	0	1	0
171	65	4	0	2	3	1	1	1	1	0	1	0
172	25	0	1	3	2	1	0	0	0	0	0	0
173	67	4	1	2	3	1	0	1	1	1	0	1
174	58	3	1	2	3	0	0	1	1	0	1	1
175	42	2	0	1	1	1	0	1	1	0	0	1
176	54	3	1	2	2	0	2	1	0	0	1	0
177	52	3	1	2	3	0	1	1	1	0	1	0
178	34	1	1	1	3	0	1	1	0	0	1	0
179	23	0	0	3	2	0	0	0	0	0	0	1
180	62	4	0	2	2	0	1	1	0	0	1	0
181	55	3	0	2	3	1	1	1	1	0	1	1
182	52	3	0	3	3	1	1	1	1	0	1	0
183	55	3	1	1	3	0	1	1	0	0	0	0
184	25	0	1	3	3	1	0	0	1	0	1	1
185	34	1	0	3	2	0	1	0	1	0	0	1
186	63	4	1	1	3	0	1	1	1	1	1	0
187	47	2	0	3	3	1	1	0	1	0	0	0
188	65	4	1	0	3	1	1	1	1	0	0	0
189	65	4	1	0	3	0	0	1	0	0	1	0
190	25	0	1	3	2	1	0	0	0	0	1	1
191	28	0	1	3	2	1	0	0	1	1	0	1
192	55	3	1	2	3	1	1	1	1	0	1	1
193	59	3	0	2	3	0	1	1	1	0	0	0
194	42	2	1	3	3	0	0	1	0	0	1	1
195	42	2	0	3	3	1	1	0	0	0	0	1
196	64	4	1	2	3	0	0	1	1	1	1	0
197	68	4	1	3	3	0	1	1	1	1	1	0
198	59	3	0	2	3	1	1	1	0	0	0	1
199	54	3	0	2	3	1	1	1	0	1	1	1
200	54	3	1	1	3	1	2	1	0	0	1	0
201	48	2	1	1	3	0	1	1	0	0	1	0
202	63	4	1	2	3	0	0	1	1	1	1	1
203	45	2	1	3	3	0	1	1	1	0	1	1
204	46	2	0	2	3	1	1	1	0	0	1	0
205	57	3	1	0	3	0	1	1	1	0	1	1
206	53	3	1	1	3	1	1	1	1	0	1	0
207	61	4	0	3	3	1	1	2	0	0	0	0
208	57	3	0	2	2	1	1	1	1	1	1	0
209	59	3	0	2	3	0	2	1	1	1	0	1
210	69	4	0	2	3	1	1	1	0	0	1	0
211	66	4	1	2	3	0	0	1	1	1	0	1
212	41	2	0	3	3	1	0	1	0	0	0	0
213	56	3	0	0	3	1	1	1	1	0	1	1
214	66	4	1	2	3	0	1	1	1	0	1	0
215	27	0	0	3	3	0	1	0	0	0	0	0
216	60	4	0	2	3	1	0	1	0	0	0	1
217	69	4	0	0	0	1	1	1	1	0	0	0
218	68	4	1	2	3	1	2	1	1	1	0	0
219	61	4	0	2	2	1	1	1	1	0	0	1
220	53	3	0	2	3	1	2	2	0	0	0	0
221	51	3	1	2	3	1	2	1	1	0	1	1
222	73	5	0	2	3	1	2	1	1	0	1	0
223	66	4	1	1	1	1	1	1	0	1	1	0
224	60	4	1	1	3	1	1	1	0	0	1	0
225	66	4	0	1	3	1	3	1	1	0	1	0
226	77	5	0	1	3	1	2	1	0	1	0	1
227	62	4	1	4	1	1	1	1	0	1	1	1
228	54	3	1	2	3	1	2	1	1	0	1	1
229	62	4	1	2	3	1	1	1	1	0	1	1
230	55	3	0	0	3	1	3	1	1	0	1	1
231	71	5	0	2	2	1	2	1	0	0	0	0
232	65	4	0	1	3	1	1	2	0	0	1	1
233	39	1	0	2	3	1	1	0	0	0	0	1
234	48	2	1	1	3	1	1	1	1	0	1	0
235	62	4	0	1	3	1	1	1	1	0	0	1
236	68	4	0	2	3	1	1	1	1	1	1	1
237	42	2	0	0	0	1	1	1	0	0	0	0
238	61	4	1	2	3	1	1	1	1	1	1	0
239	59	3	1	1	1	1	2	1	1	0	1	1
240	71	5	1	2	3	1	2	1	0	0	1	1
241	60	4	0	2	1	1	1	1	1	0	1	0
242	47	2	1	2	3	1	1	1	1	1	0	1
243	43	2	1	2	3	1	1	1	0	0	0	0
244	65	4	1	1	3	1	2	1	1	0	1	1
245	53	3	0	2	1	1	2	1	0	0	1	1
246	60	4	0	2	2	1	1	1	1	0	0	0
247	36	1	0	2	2	1	2	0	0	0	0	0
248	60	4	0	2	1	1	2	1	1	0	1	1
249	66	4	1	1	3	1	2	2	1	0	0	0
250	51	3	1	1	0	1	2	1	1	1	1	0
251	32	1	1	2	2	1	2	0	1	0	1	1
252	57	3	1	1	3	1	1	1	1	0	1	0
253	50	3	1	1	3	1	1	1	1	0	0	0
254	56	3	1	1	1	1	2	1	0	0	0	0
255	73	5	0	1	2	1	2	1	0	0	0	1
256	39	1	0	0	0	1	2	1	0	0	1	0
257	67	4	1	0	2	1	2	1	0	0	1	0
258	41	2	0	2	3	1	1	0	1	0	0	1
259	51	3	0	2	2	1	3	1	1	1	1	1
260	53	3	0	2	3	1	1	1	1	1	1	1
261	72	5	0	0	3	1	1	1	1	0	0	0
262	57	3	1	1	3	1	1	1	0	0	1	1
263	63	4	1	1	0	1	1	1	0	0	1	1
264	49	2	0	2	3	1	1	2	0	0	0	1
265	36	1	0	3	2	1	1	0	1	0	0	0
266	61	4	1	2	3	1	2	1	1	1	1	1
267	69	4	1	1	1	1	1	1	0	0	1	0
268	66	4	0	2	2	1	1	1	1	0	1	1
269	61	4	1	1	1	1	1	0	0	0	1	0
270	70	5	0	2	3	1	1	1	1	0	0	0
271	57	3	0	1	3	1	2	1	0	1	1	0
272	76	5	0	0	1	1	0	1	1	0	1	1
273	49	2	1	2	3	1	2	1	0	0	1	0
274	69	4	1	2	3	1	1	1	0	0	1	1
275	58	3	1	2	2	1	1	1	1	1	0	1
276	56	3	1	1	3	1	1	1	1	0	1	1
277	68	4	1	2	2	1	1	1	1	0	1	1
278	53	3	1	1	3	1	2	1	0	0	1	0
279	65	4	1	2	3	1	3	1	0	0	1	0
280	60	4	1	2	3	1	1	0	1	0	1	0
281	71	5	1	2	3	1	2	1	1	0	1	1
282	63	4	0	3	3	1	1	0	0	0	1	1
283	67	4	1	2	3	1	1	2	0	0	0	0
284	62	4	1	2	1	1	1	1	0	0	0	1
285	38	1	0	1	1	1	1	0	1	0	0	1
286	51	3	0	2	3	1	1	1	1	0	1	1
287	64	4	1	2	3	1	0	1	0	0	0	1
288	56	3	0	2	3	1	1	1	1	0	0	1
289	43	2	1	1	2	1	1	1	0	0	0	0
290	65	4	1	2	2	1	2	1	1	0	0	0
291	67	4	0	0	2	1	3	1	1	0	1	0
292	71	5	0	2	2	1	2	1	1	0	1	0
293	64	4	0	1	3	1	3	1	0	0	1	1
294	70	5	1	1	0	1	0	1	1	0	0	1
295	63	4	1	0	3	1	1	1	1	0	1	0
296	67	4	0	2	2	1	1	1	1	1	1	1
297	68	4	1	1	3	1	1	1	1	0	0	1
298	68	4	0	1	1	1	1	1	1	1	0	0
299	33	1	0	3	3	1	1	0	1	1	1	1
300	60	4	0	2	3	1	1	1	1	1	1	1
301	43	2	1	2	2	1	2	1	0	1	1	1
302	59	3	0	2	3	1	2	1	1	0	1	1
303	62	4	1	2	3	1	0	1	0	0	1	0
304	56	3	1	2	2	1	1	1	0	0	1	1
305	64	4	0	0	1	1	3	1	0	0	1	0
306	30	1	0	3	3	1	3	0	0	0	0	0
307	61	4	1	1	3	1	1	1	1	0	0	1
308	62	4	1	2	3	1	1	1	0	0	0	1
309	70	5	1	0	0	1	2	1	1	0	1	1
310	63	4	1	1	3	1	1	1	0	0	1	0
311	65	4	1	2	2	1	2	1	1	1	1	1
312	55	3	1	2	2	1	2	1	0	1	0	1
313	62	4	1	0	0	1	1	1	0	0	0	0
314	84	5	0	2	2	1	1	1	0	0	1	0
315	62	4	1	2	3	1	0	2	1	1	1	0
316	53	3	1	2	3	1	2	2	1	0	1	0
317	64	4	1	2	3	1	1	1	1	0	1	1
318	63	4	1	1	3	1	1	1	0	0	1	0
319	54	3	1	1	3	1	2	1	0	0	1	1
320	59	3	1	1	3	1	1	1	0	0	1	0
321	59	3	1	2	3	1	3	1	0	0	1	0
322	60	4	0	2	2	1	1	1	1	0	0	1
323	68	4	0	5	1	1	1	1	0	0	0	0
324	55	3	1	1	3	1	1	1	0	0	0	0
325	63	4	0	0	3	1	3	1	0	0	0	1
326	56	3	1	4	1	1	1	1	0	0	1	0
327	24	0	0	2	3	1	3	0	1	0	0	1
328	28	0	1	0	1	1	3	0	1	0	1	1
329	51	3	0	2	2	1	1	0	0	0	0	0
330	68	4	0	2	1	1	1	1	1	1	1	1
331	54	3	1	2	3	1	2	1	0	0	1	1
332	60	4	1	1	3	1	2	1	0	1	1	1
333	68	4	0	0	2	1	1	1	0	0	0	0
334	68	4	1	2	3	1	1	1	1	0	0	1
335	52	3	0	2	2	1	2	1	1	1	0	0
336	55	3	1	2	2	1	2	1	0	0	1	0
337	76	5	1	1	3	1	1	2	1	0	1	0
338	67	4	0	2	3	1	3	1	1	0	1	0
339	60	4	1	2	2	1	1	1	0	0	1	1
340	58	3	0	2	1	1	3	1	0	0	1	1
341	55	3	0	1	3	1	2	1	0	0	0	0
342	58	3	0	2	3	1	2	0	1	1	0	1
343	61	4	1	1	3	1	2	0	0	0	1	0
344	64	4	1	0	3	1	1	1	0	1	0	0
345	53	3	1	1	3	1	2	1	1	0	1	1
346	56	3	0	1	1	1	1	1	0	1	1	1
347	64	4	1	1	0	1	2	1	0	0	1	0
348	66	4	1	1	3	1	1	1	0	1	1	1
349	66	4	0	0	0	1	3	1	0	0	0	0
350	66	4	0	2	3	1	1	1	1	0	1	1
351	39	1	0	3	3	1	1	0	1	0	0	1
352	69	4	1	1	1	1	2	1	1	1	1	0
353	65	4	0	1	3	1	1	1	1	0	1	1
354	54	3	0	1	3	1	1	1	0	0	0	0
355	60	4	1	1	2	1	2	1	1	0	1	1
356	68	4	0	1	0	1	1	1	1	0	0	1
357	60	4	0	1	3	1	1	1	1	0	0	0
358	37	1	0	3	3	1	1	0	1	0	0	1
359	58	3	1	0	0	1	1	1	1	0	1	1
360	63	4	1	2	3	1	1	1	0	0	1	1
361	79	5	0	2	3	1	3	1	1	0	0	0
362	53	3	1	1	3	1	1	1	1	0	1	0
363	52	3	0	2	1	1	2	1	1	1	1	1
364	75	5	0	0	0	1	0	2	1	0	0	1
365	51	3	0	2	3	1	1	1	0	0	1	1
366	63	4	0	1	3	0	0	1	0	0	0	0
367	37	1	0	2	3	0	1	1	1	1	1	1
368	66	4	0	2	3	0	0	1	0	0	0	0
369	33	1	0	2	2	1	2	1	0	0	0	1
370	56	3	1	2	3	0	2	1	1	0	1	0
371	72	5	0	3	3	0	0	1	1	0	1	0
372	57	3	1	2	3	0	0	1	1	0	1	0
373	39	1	0	1	1	0	0	1	0	0	1	1
374	60	4	1	2	3	0	0	1	0	0	1	1
375	53	3	1	1	3	0	1	1	0	0	1	1
376	65	4	0	2	3	1	0	1	0	0	1	0
377	48	2	0	2	3	0	1	1	1	1	1	1
378	42	2	1	2	3	1	1	1	0	0	0	0
379	68	4	0	1	2	1	0	1	1	0	1	1
380	51	3	0	2	2	0	1	1	0	0	0	1
381	51	3	0	2	2	0	1	1	0	0	1	0
382	62	4	0	2	3	1	1	1	0	0	1	1
383	50	3	1	4	0	1	1	1	0	0	1	1
384	57	3	0	2	2	0	0	0	0	1	0	0
385	43	2	0	2	2	1	1	1	1	0	1	1
386	48	2	0	3	2	1	1	1	1	0	1	0
387	34	1	0	0	2	1	1	1	0	0	1	1
388	29	0	1	2	0	1	2	0	0	0	0	0
389	57	3	0	2	3	0	1	1	1	0	1	0
390	83	5	0	0	2	1	0	1	0	0	0	0
391	64	4	0	2	3	1	0	1	0	1	0	1
392	76	5	0	2	3	1	3	1	1	0	1	1
393	56	3	0	4	1	1	2	0	0	0	1	0
394	29	0	1	0	2	0	1	0	0	0	1	1
395	50	3	1	3	2	0	1	1	0	0	0	0
396	78	5	0	2	3	1	2	1	1	1	1	0
397	37	1	0	3	2	1	0	0	1	0	1	1
398	56	3	0	2	3	0	2	1	0	0	1	1
399	63	4	1	1	3	1	0	1	0	0	1	1
400	51	3	0	2	3	1	1	1	1	1	1	1
401	55	3	1	2	2	0	0	1	0	0	1	0
402	67	4	0	2	3	1	1	1	1	0	1	1
403	61	4	0	3	2	0	1	1	0	0	1	1
404	60	4	0	0	0	1	1	1	1	0	1	0
405	50	3	1	2	2	0	1	1	0	0	1	0
406	55	3	0	2	2	0	0	1	1	0	1	0
407	53	3	1	2	2	0	0	1	0	0	1	0
408	33	1	1	2	3	1	0	1	0	0	1	1
409	51	3	0	1	0	1	0	1	0	1	1	0
410	64	4	0	1	1	0	0	1	1	1	0	0
411	55	3	0	3	3	0	1	1	0	0	0	1
412	61	4	1	1	2	1	1	1	1	1	0	1
413	59	3	0	0	2	1	2	1	0	0	0	0
414	39	1	0	0	0	1	0	1	1	0	0	0
415	48	2	0	2	1	0	1	1	0	0	0	1
416	57	3	0	2	2	1	1	1	0	0	0	1
417	69	4	0	2	3	1	1	1	0	1	0	1
418	63	4	1	3	3	1	1	1	0	0	1	1
419	56	3	0	2	3	1	1	1	0	1	1	1
420	50	3	0	2	2	1	2	1	1	0	0	0
421	61	4	1	2	3	1	0	1	1	0	1	0
422	53	3	0	1	3	1	1	1	0	0	1	1
423	46	2	0	2	2	0	2	1	0	0	1	0
424	64	4	0	2	2	0	1	1	1	0	1	1
425	56	3	0	2	3	1	1	1	0	0	1	0
426	42	2	1	3	3	1	0	1	0	0	0	1
427	67	4	0	2	3	1	0	1	1	0	0	0
428	51	3	0	4	0	1	1	1	1	0	1	0
429	63	4	1	2	1	1	0	1	1	0	1	0
430	50	3	1	2	2	0	1	1	1	1	0	1
431	33	1	0	0	3	1	1	1	0	0	0	0
432	60	4	0	1	3	1	0	1	0	1	1	0
433	59	3	0	2	3	1	2	1	0	1	1	0
434	76	5	1	1	3	1	2	1	0	0	1	0
435	53	3	1	2	3	1	2	1	1	0	1	1
436	36	1	1	3	2	1	1	1	0	0	1	0
437	64	4	0	1	0	0	0	1	0	1	1	0
438	51	3	1	2	2	0	1	1	0	0	0	1
439	66	4	0	2	3	1	1	1	0	0	1	1
440	29	0	0	2	3	1	1	1	0	0	0	0
441	63	4	0	2	3	1	1	1	1	0	1	0
442	42	2	1	3	2	1	1	1	0	0	1	1
443	52	3	1	1	3	0	0	1	0	0	1	0
444	55	3	1	1	3	0	0	1	0	0	1	0
445	51	3	1	3	3	1	1	1	0	1	1	1
446	48	2	0	4	1	1	1	1	0	0	1	0
447	49	2	1	4	3	1	0	1	0	1	0	0
448	54	3	0	1	3	0	1	1	0	1	1	0
449	47	2	0	1	3	0	1	0	0	1	1	0
450	46	2	0	2	2	0	1	1	0	0	1	0
451	32	1	0	3	3	1	0	0	0	0	1	0
452	62	4	1	0	3	0	0	1	0	0	0	1
453	63	4	0	2	3	1	1	1	1	0	1	1
454	61	4	0	2	0	1	0	1	0	0	0	0
455	59	3	1	1	3	0	0	1	1	1	1	1
456	52	3	1	2	2	0	0	1	0	1	1	1
457	37	1	0	2	3	1	1	1	0	0	0	0
458	61	4	0	2	2	0	0	1	1	0	1	1
459	48	2	0	3	1	1	0	0	0	0	0	0
460	59	3	0	0	3	1	0	1	1	0	0	0
461	34	1	0	2	2	1	1	1	0	0	0	0
462	65	4	0	1	0	0	0	1	0	1	1	0
463	41	2	1	1	0	0	1	2	0	0	0	0
464	39	1	0	1	0	0	1	1	0	0	0	0
465	37	1	0	1	1	0	1	1	0	0	1	0
466	49	2	0	2	3	0	1	1	0	0	1	1
467	51	3	1	2	3	0	1	1	1	0	0	1
468	59	3	0	0	0	1	0	1	0	1	1	0
469	63	4	1	1	3	1	0	1	1	1	1	0
470	50	3	0	1	0	1	1	0	0	1	0	1
471	38	1	1	0	0	0	1	1	0	0	1	0
472	59	3	1	3	2	0	1	1	1	0	1	0
473	69	4	0	2	2	1	1	2	1	0	0	1
474	52	3	1	1	3	1	1	1	0	0	1	0
475	28	0	1	2	3	1	1	1	0	0	0	0
476	57	3	1	1	3	1	0	1	0	0	1	0
477	60	4	1	2	0	0	1	1	0	0	1	0
478	59	3	0	0	3	1	1	1	1	0	1	1
479	46	2	1	1	3	0	0	1	1	1	1	0
480	63	4	0	3	2	0	0	0	0	0	1	0
481	60	4	1	2	2	0	1	1	1	1	1	1
482	57	3	0	2	3	0	1	0	0	0	0	0
483	67	4	0	2	3	0	1	1	0	0	1	1
484	64	4	0	2	2	0	0	1	0	0	1	0
485	78	5	1	1	2	1	0	1	0	0	1	0
486	63	4	1	1	3	0	0	1	1	1	1	1
487	68	4	0	2	3	0	1	1	0	0	0	1
488	62	4	0	2	3	0	0	1	0	0	1	0
489	62	4	1	2	3	0	1	1	1	0	1	1
490	61	4	0	1	3	1	1	1	0	0	1	0
491	65	4	0	1	3	0	0	1	0	1	1	1
492	66	4	1	2	2	1	2	1	1	1	0	1
493	46	2	0	0	0	0	0	1	1	0	0	1
494	35	1	0	0	0	0	0	0	0	0	0	0
495	59	3	1	3	2	0	0	1	0	1	0	1
496	58	3	1	2	1	1	2	1	0	0	1	0
497	66	4	0	1	1	1	1	1	0	1	0	0
498	49	2	0	2	2	0	1	1	0	0	0	0
499	58	3	0	0	3	1	2	1	1	0	0	0
500	61	4	0	2	3	0	0	1	0	1	1	0
501	57	3	0	2	0	0	1	1	0	0	1	1
502	78	5	1	3	3	1	0	1	0	0	0	0
503	52	3	0	2	2	0	1	1	0	0	0	1
504	59	3	1	2	3	0	2	1	1	0	1	1
505	49	2	1	2	3	0	1	1	0	0	1	0
506	42	2	0	1	3	1	2	1	0	0	1	0
507	30	1	0	3	2	1	0	1	0	0	0	1
508	62	4	0	2	3	1	1	1	0	0	1	0
509	60	4	0	2	3	0	0	1	0	1	1	1
510	63	4	1	0	3	1	0	1	0	0	1	0
511	62	4	1	1	0	0	0	1	1	1	1	1
512	55	3	0	2	3	0	2	1	1	0	0	1
513	59	3	0	4	3	0	0	1	0	0	1	1
514	51	3	0	2	3	0	1	1	0	0	1	1
515	35	1	1	2	2	0	1	1	0	0	0	0
516	60	4	0	2	2	0	1	1	1	0	0	0
517	65	4	0	2	3	1	1	1	1	1	1	1
518	63	4	0	1	1	0	1	1	1	0	1	1
519	57	3	0	2	1	1	1	1	1	1	0	1
520	55	3	1	2	1	0	2	1	0	1	1	1
521	56	3	0	1	3	0	1	1	1	1	1	1
522	34	1	1	2	2	1	2	0	0	0	0	1
523	69	4	1	2	2	1	1	1	0	0	1	0
524	51	3	0	2	3	0	1	1	0	0	0	1
525	58	3	0	1	2	1	0	0	1	0	1	0
526	62	4	1	3	2	0	0	1	1	0	0	0
527	50	3	0	2	3	0	1	1	0	0	1	0
528	41	2	1	0	3	0	1	1	0	0	0	0
529	33	1	0	3	2	0	0	0	0	0	0	1
530	65	4	0	2	2	0	0	1	0	0	0	0
531	57	3	0	2	3	0	1	2	1	0	1	1
532	51	3	1	2	2	0	0	1	0	0	0	1
533	56	3	0	2	2	0	1	1	0	1	1	1
534	43	2	1	3	2	0	0	0	0	1	0	0
535	45	2	1	0	3	1	0	1	0	0	0	0
536	57	3	1	2	3	1	1	1	1	0	0	0
537	43	2	1	2	3	0	0	1	0	0	0	1
538	62	4	0	2	3	0	1	1	1	0	1	1
539	30	1	0	2	3	1	1	0	1	0	0	0
540	68	4	0	2	3	1	1	1	1	1	0	1
541	52	3	1	2	3	1	1	1	0	0	1	1
542	39	1	0	2	3	1	1	1	0	0	1	1
543	47	2	1	2	2	1	1	1	0	0	0	1
544	53	3	0	2	2	0	1	1	1	1	1	1
545	63	4	0	2	2	1	1	1	1	0	0	1
546	62	4	0	3	3	1	1	0	0	0	0	0
547	76	5	1	1	2	1	1	1	1	0	1	1
548	55	3	1	1	3	1	2	1	0	0	1	0
549	54	3	0	1	3	1	2	1	1	0	1	0
550	63	4	1	0	3	0	0	1	0	0	1	0
551	67	4	0	2	2	1	1	1	0	1	1	1
552	57	3	1	1	3	1	0	1	0	0	0	0
553	35	1	0	3	3	1	1	0	1	0	0	1
554	70	5	1	2	3	1	0	1	1	0	1	1
555	33	1	1	3	2	1	1	0	0	0	0	1
556	66	4	1	2	2	1	1	1	1	1	0	0
557	58	3	1	1	3	1	2	1	1	1	1	0
558	80	5	0	1	3	1	1	1	1	0	1	1
559	58	3	0	0	3	1	0	1	0	1	1	1
560	53	3	1	0	3	1	1	1	0	0	1	1
561	51	3	1	2	3	0	1	2	1	0	1	1
562	62	4	1	2	2	1	1	1	1	0	1	1
563	63	4	0	2	3	1	1	1	1	1	1	1
564	58	3	0	0	0	1	1	0	0	0	0	0
565	57	3	1	2	2	0	2	1	1	0	1	1
566	43	2	1	1	3	1	2	1	0	0	0	0
567	28	0	1	3	3	1	1	0	0	0	1	0
568	61	4	0	2	2	0	0	1	1	0	1	1
569	63	4	1	2	2	1	1	1	0	0	1	0
570	62	4	0	1	3	1	1	1	0	0	0	1
571	43	2	1	0	3	0	1	1	0	0	1	0
572	41	2	0	2	1	1	1	1	0	0	0	0
573	65	4	0	2	1	1	0	1	0	0	0	0
574	66	4	0	2	3	1	1	1	0	0	0	1
575	60	4	1	2	3	1	0	1	0	1	0	1
576	56	3	0	3	2	1	0	0	1	0	0	1
577	33	1	1	2	2	1	2	0	0	0	0	0
578	62	4	1	2	2	1	1	1	0	0	1	0
579	50	3	1	2	1	0	1	1	0	0	0	0
580	49	2	1	2	3	1	1	1	0	0	1	1
581	50	3	1	4	1	0	1	1	0	1	1	1
582	58	3	0	2	3	1	1	1	0	0	0	0
583	53	3	0	3	2	1	0	1	0	0	1	1
584	54	3	0	2	3	1	2	1	1	0	1	1
585	37	1	0	2	3	1	2	0	1	0	0	0
586	44	2	0	2	3	1	1	1	1	0	0	1
587	54	3	1	4	0	1	2	1	1	0	0	1
588	62	4	1	1	0	1	0	1	1	1	1	1
589	63	4	1	2	3	1	1	2	1	0	1	0
590	58	3	0	2	0	0	0	1	1	0	1	1
591	58	3	1	1	3	1	0	1	0	1	1	1
592	78	5	0	1	3	1	2	1	0	0	1	0
593	62	4	0	1	1	0	1	1	0	0	0	1
594	70	5	0	1	3	0	1	1	1	1	1	1
595	23	0	0	3	3	1	1	0	0	0	0	0
596	65	4	0	2	2	0	0	1	1	0	0	1
597	48	2	1	2	2	0	0	1	0	0	1	1
598	30	1	1	0	2	0	2	0	0	0	0	0
599	37	1	0	3	3	1	1	1	0	0	0	0
600	64	4	1	2	3	1	0	1	0	0	1	1
601	63	4	0	2	3	1	1	1	1	1	0	0
602	29	0	0	1	0	1	2	0	0	0	0	1
603	29	0	1	3	3	1	0	0	0	0	0	1
604	60	4	0	2	2	0	1	1	0	0	0	1
605	57	3	1	1	3	1	2	1	1	0	1	1
606	43	2	0	2	3	0	1	1	0	0	1	1
607	61	4	0	2	3	1	1	1	0	0	1	0
608	71	5	0	1	0	1	1	1	1	1	0	1
609	61	4	1	2	3	1	1	1	1	0	1	0
610	51	3	0	2	2	1	1	1	0	0	1	0
611	56	3	0	2	2	0	2	1	1	0	1	0
612	49	2	0	2	3	1	1	1	0	0	0	0
613	57	3	1	2	3	0	1	1	1	0	1	1
614	49	2	0	2	3	0	0	0	1	1	1	0
615	59	3	1	2	3	1	0	1	0	0	1	1
616	53	3	1	2	2	0	0	1	1	0	0	0
617	52	3	1	2	3	1	2	1	1	0	0	1
618	67	4	0	2	3	0	0	1	0	0	1	0
619	55	3	1	2	2	0	0	1	1	0	1	1
620	62	4	0	2	2	1	1	1	0	0	1	0
621	60	4	1	1	2	1	1	2	0	0	0	0
622	65	4	1	2	3	1	0	1	0	0	1	0
623	57	3	0	3	3	0	0	0	0	0	0	0
624	66	4	1	2	3	1	0	1	0	0	1	0
625	21	0	0	3	3	1	0	0	0	0	0	1
626	57	3	1	2	3	0	0	1	1	0	1	0
627	35	1	0	3	2	1	0	0	1	0	1	1
628	49	2	1	0	2	0	0	1	0	0	1	1
629	46	2	1	3	2	0	0	1	0	0	0	1
630	61	4	1	2	3	1	1	1	1	1	1	0
631	63	4	0	0	2	1	0	1	1	0	0	0
632	32	1	0	5	0	1	2	0	0	0	0	1
633	42	2	0	0	2	1	1	1	1	0	1	1
634	57	3	1	2	3	1	0	1	0	0	0	0
635	58	3	1	0	3	0	2	1	0	0	1	0
636	59	3	0	1	3	0	1	1	0	0	1	0
637	59	3	1	3	3	1	0	1	1	1	1	1
638	57	3	0	2	3	0	1	1	1	0	0	1
639	24	0	1	3	3	1	0	0	0	0	0	0
640	60	4	0	2	2	0	0	1	0	0	1	1
641	61	4	1	1	2	1	1	1	1	0	1	0
642	55	3	1	2	3	0	1	1	0	0	1	1
643	43	2	0	3	2	0	0	1	0	0	0	1
644	63	4	0	0	1	1	1	1	0	0	1	0
645	64	4	1	1	3	1	2	1	0	0	1	1
646	61	4	1	1	3	1	1	1	1	0	1	0
647	24	0	1	2	3	1	3	0	0	0	1	1
648	53	3	1	0	3	1	0	1	0	0	1	1
649	67	4	0	1	3	1	1	1	0	0	1	0
650	48	2	0	1	3	1	2	1	0	0	1	1
651	66	4	0	1	3	1	2	1	1	0	0	1
652	27	0	0	3	1	1	0	0	1	0	1	1
653	61	4	0	0	3	0	0	1	0	1	1	0
654	58	3	0	2	3	0	0	1	0	0	1	1
655	53	3	0	2	3	0	2	1	1	1	1	1
656	69	4	1	1	3	1	1	1	0	0	1	0
657	66	4	1	2	3	1	1	1	0	0	1	1
658	68	4	1	0	2	1	0	1	0	0	0	1
659	40	2	1	3	2	0	0	1	0	0	1	1
660	44	2	1	3	3	1	1	1	1	0	0	1
661	62	4	1	1	2	1	1	1	0	0	0	1
662	28	0	0	3	3	1	1	0	1	1	1	1
663	50	3	0	2	2	0	1	1	0	0	0	0
664	37	1	0	3	2	0	1	1	0	0	1	1
665	62	4	1	2	2	1	3	1	1	1	1	1
666	66	4	1	1	3	1	0	2	1	0	0	1
667	67	4	1	2	3	1	0	1	1	0	1	1
668	45	2	1	3	2	0	0	1	0	0	1	1
669	48	2	1	2	2	1	3	1	0	0	1	0
670	63	4	0	2	1	0	0	1	0	0	1	0
671	56	3	0	2	3	1	1	1	1	1	0	1
672	60	4	1	1	3	1	1	1	1	0	1	0
673	65	4	0	2	2	1	2	1	1	1	1	1
674	76	5	0	0	3	1	3	1	0	0	0	0
675	59	3	0	2	3	1	2	1	1	0	1	1
676	68	4	0	2	3	1	3	1	1	0	1	1
677	57	3	0	1	3	0	1	1	1	1	1	0
678	62	4	0	2	2	0	1	1	0	1	1	0
679	71	5	0	2	3	1	0	1	0	0	1	0
680	46	2	0	2	3	1	1	1	0	1	1	1
681	68	4	0	1	3	1	1	1	1	0	1	1
682	65	4	1	3	3	1	1	1	0	0	1	0
683	58	3	0	2	2	0	1	1	0	0	0	0
684	70	5	0	2	2	0	0	1	0	0	1	1
685	48	2	1	3	2	0	0	1	1	1	0	1
686	49	2	0	2	3	0	2	1	1	0	1	1
687	49	2	0	2	3	0	1	1	0	0	0	0
688	44	2	1	2	2	0	1	1	0	0	1	0
689	54	3	1	1	3	1	2	1	0	0	1	0
690	63	4	0	2	2	0	1	1	0	1	1	0
691	63	4	1	2	3	1	0	1	0	0	1	0
692	63	4	1	1	3	1	1	1	0	0	1	0
693	46	2	1	2	3	0	1	1	0	1	0	1
694	57	3	1	2	3	1	1	1	1	0	1	0
695	67	4	1	1	3	1	1	1	1	0	1	0
696	52	3	0	1	3	0	1	1	0	0	1	1
697	55	3	0	3	3	1	1	0	0	0	0	0
698	61	4	1	2	3	1	1	2	1	0	1	1
699	55	3	1	2	1	1	2	1	0	0	1	0
700	65	4	0	1	2	1	0	1	0	0	1	1
701	61	4	1	1	3	1	1	1	0	0	0	1
702	64	4	0	2	3	1	1	1	1	1	1	1
703	62	4	1	2	3	1	0	1	1	0	1	1
704	25	0	0	4	3	1	3	0	1	0	0	1
705	52	3	1	2	2	1	2	1	0	0	0	0
706	60	4	0	2	2	0	0	1	0	0	1	0
707	69	4	1	2	2	1	0	1	0	0	1	1
708	71	5	0	2	3	1	0	1	0	0	0	0
709	52	3	1	2	3	0	0	1	0	1	0	1
710	69	4	1	2	2	1	1	1	1	0	0	0
711	29	0	0	3	0	1	0	0	0	0	0	1
712	55	3	1	2	3	0	0	1	0	0	1	0
713	64	4	0	0	2	1	3	1	1	0	1	1
714	57	3	1	2	3	1	0	1	0	0	0	0
715	67	4	0	1	3	0	0	1	0	0	1	0
716	68	4	0	2	0	1	1	1	1	0	1	1
717	66	4	0	1	3	1	1	1	0	0	1	1
718	65	4	0	2	1	1	1	1	0	0	1	1
719	59	3	0	2	3	0	0	1	1	0	1	1
720	27	0	1	2	2	1	2	0	0	0	1	0
721	46	2	0	2	2	1	1	1	0	0	1	1
722	57	3	1	1	3	1	0	1	0	0	1	1
723	60	4	1	1	2	0	0	1	1	0	1	1
724	38	1	1	2	3	0	1	1	0	0	0	0
725	54	3	1	2	2	1	0	1	0	0	1	1
726	59	3	1	2	2	1	1	1	0	0	1	0
727	67	4	0	2	2	1	1	1	0	0	0	0
728	44	2	0	4	3	1	1	0	0	1	1	1
729	60	4	0	2	3	1	2	1	0	0	0	0
730	40	2	0	2	2	1	2	1	0	0	1	0
731	45	2	0	3	2	1	1	1	0	0	0	0
732	57	3	0	2	3	1	2	1	1	0	0	1
733	63	4	1	2	3	1	0	1	1	1	1	0
734	54	3	1	1	2	1	1	1	0	0	1	0
735	60	4	1	2	3	1	0	1	0	0	1	0
736	62	4	1	2	3	1	0	1	0	0	1	1
737	50	3	1	0	3	1	1	1	0	0	0	0
738	56	3	1	2	2	1	1	1	1	0	1	1
739	65	4	1	2	1	1	0	1	0	0	1	1
740	51	3	1	2	3	1	1	1	0	0	0	0
741	48	2	0	4	2	0	2	1	0	0	1	0
742	49	2	1	4	2	1	2	1	0	1	1	1
743	66	4	0	1	3	1	0	1	0	0	0	1
744	65	4	1	2	3	0	0	1	1	0	1	1
745	50	3	0	2	2	1	2	1	0	0	1	0
746	71	5	0	0	2	0	1	1	1	0	1	0
747	49	2	0	3	3	0	0	1	0	0	0	0
748	68	4	0	1	2	0	1	1	1	1	1	0
749	74	5	0	0	3	1	0	1	1	1	0	1
750	45	2	1	2	2	0	1	1	1	0	0	0
751	59	3	0	2	2	0	1	1	1	0	1	1
752	51	3	1	0	2	1	0	1	1	0	1	1
753	60	4	0	3	3	1	0	2	1	1	0	0
754	58	3	0	2	2	1	1	0	1	1	1	0
755	64	4	1	2	3	0	0	1	1	0	1	0
756	28	0	1	3	2	1	0	0	0	0	0	0
757	53	3	1	2	3	1	2	1	0	0	1	1
758	69	4	0	2	2	0	1	1	1	0	1	1
759	59	3	1	2	2	0	1	1	0	0	1	0
760	42	2	0	3	3	1	1	1	1	0	1	1
761	61	4	0	2	3	1	1	1	1	0	1	1
762	40	2	1	2	2	1	1	1	0	0	0	0
763	36	1	0	1	1	1	1	1	0	1	1	1
764	50	3	1	3	3	1	0	0	0	0	1	1
765	62	4	0	4	1	1	1	1	1	0	1	1
766	68	4	1	2	2	0	0	1	0	0	1	1
767	66	4	0	1	1	1	1	1	1	1	1	1
768	59	3	0	1	1	1	1	1	0	0	1	1
769	69	4	1	1	1	0	1	1	1	0	0	0
770	59	3	1	2	3	1	0	1	0	1	1	0
771	61	4	0	2	1	1	1	1	1	0	1	0
772	42	2	1	0	3	1	1	1	0	0	1	1
773	51	3	1	2	2	0	1	0	0	0	0	0
774	44	2	1	0	3	0	1	1	0	0	1	0
775	23	0	1	3	2	1	0	0	0	0	0	1
776	55	3	1	2	2	0	1	1	0	0	1	0
777	68	4	0	2	3	1	0	0	0	0	0	0
778	63	4	0	2	2	0	0	1	0	0	0	0
779	66	4	1	2	2	0	0	1	1	0	1	0
780	62	4	1	2	2	0	0	1	0	0	1	1
781	59	3	1	2	2	1	1	1	0	0	1	0
782	43	2	1	1	2	1	1	2	0	0	0	0
783	59	3	1	0	3	1	0	1	1	1	1	1
784	45	2	0	2	2	0	0	2	1	0	1	1
785	60	4	0	1	3	1	0	1	0	0	1	1
786	66	4	0	2	3	1	0	1	1	1	1	1
787	79	5	1	0	3	0	0	2	1	0	0	1
788	43	2	1	2	2	1	1	1	0	0	0	0
789	58	3	1	1	3	1	1	1	0	0	1	0
790	44	2	0	2	2	0	1	1	0	0	1	0
791	23	0	0	2	0	1	2	0	0	0	0	0
792	52	3	1	1	3	1	1	2	1	1	1	0
793	54	3	1	2	2	0	1	1	0	1	0	1
794	45	2	0	1	3	0	1	1	0	0	1	0
795	50	3	0	1	3	1	1	1	0	0	0	0
796	64	4	0	3	3	0	0	1	0	0	0	0
797	51	3	1	2	3	1	1	1	0	0	0	0
798	54	3	0	2	3	1	2	1	1	0	0	1
799	72	5	0	2	2	1	0	1	0	1	1	0
800	64	4	1	2	3	0	0	1	0	1	1	1
801	75	5	0	2	3	1	0	1	1	0	1	0
802	53	3	1	2	2	0	2	1	0	0	1	0
803	42	2	0	3	2	1	1	0	0	0	0	0
804	34	1	0	2	3	1	1	1	0	0	1	0
805	60	4	0	0	3	1	0	1	0	0	1	0
806	61	4	1	2	1	1	0	1	1	0	1	0
807	50	3	1	2	3	1	2	1	0	0	0	0
808	42	2	1	3	3	0	1	1	1	0	0	0
809	62	4	1	0	3	1	0	1	1	0	1	0
810	43	2	1	4	0	1	3	2	0	0	0	1
811	40	2	0	4	1	0	1	2	0	0	0	0
812	52	3	0	0	3	1	2	1	0	0	0	1
813	64	4	0	2	3	1	0	1	0	0	1	1
814	38	1	1	3	3	1	1	1	0	0	0	0
815	58	3	1	2	2	1	0	1	1	0	1	1
816	65	4	1	5	1	0	0	1	1	0	1	0
817	75	5	0	0	3	0	0	2	0	0	1	1
818	66	4	0	2	3	1	0	1	0	0	1	0
819	52	3	1	2	2	1	0	1	1	1	1	1
820	50	3	1	2	3	1	1	1	0	0	0	1
821	60	4	1	2	3	0	1	1	0	0	1	1
822	47	2	0	3	2	1	0	0	0	0	0	1
823	57	3	0	2	2	0	1	1	1	0	0	1
824	49	2	1	2	2	1	1	1	0	0	0	1
825	69	4	0	2	2	1	0	1	1	0	0	0
826	52	3	0	2	1	1	1	1	1	1	0	1
827	67	4	0	2	2	1	2	1	0	0	0	0
828	62	4	1	0	3	1	0	1	0	0	1	0
829	73	5	0	2	3	1	0	2	0	0	1	0
830	56	3	0	2	2	1	2	1	0	0	0	0
831	67	4	1	3	3	0	0	2	1	0	1	1
832	65	4	0	2	3	0	0	0	0	0	1	1
833	56	3	0	1	3	1	1	2	0	0	0	1
834	52	3	1	2	3	1	1	1	0	0	1	0
835	57	3	1	3	2	0	1	1	0	1	1	0
836	53	3	1	2	2	1	2	1	1	0	1	1
837	47	2	0	3	2	1	0	1	1	0	1	1
838	53	3	1	1	0	1	0	1	0	0	1	1
839	72	5	1	2	3	1	0	1	0	0	1	0
840	64	4	0	3	2	0	0	1	0	0	1	1
841	46	2	1	2	3	1	1	1	0	0	1	1
842	76	5	1	2	2	0	0	1	1	0	1	1
843	57	3	0	2	2	1	1	1	0	1	1	1
844	75	5	1	0	1	1	0	1	1	1	1	1
845	32	1	1	2	2	1	1	1	0	0	0	0
846	61	4	1	2	2	0	0	1	1	0	1	1
847	66	4	1	2	3	0	0	1	1	0	1	1
848	58	3	0	3	3	1	2	1	1	0	1	0
849	69	4	1	0	3	1	0	1	1	1	1	1
850	62	4	1	3	3	0	0	1	1	1	1	1
851	68	4	1	1	3	1	0	1	1	1	0	0
852	58	3	1	3	3	0	0	1	1	0	1	0
853	60	4	0	2	2	0	0	2	1	1	1	1
854	43	2	1	1	3	1	2	1	0	0	0	1
855	55	3	0	1	1	1	0	1	1	0	1	1
856	62	4	0	2	2	0	1	1	1	0	0	1
857	53	3	1	2	3	1	0	1	0	1	0	1
858	53	3	1	5	0	1	1	1	1	0	1	1
859	62	4	1	2	2	0	0	1	1	0	0	1
860	54	3	0	1	3	1	1	1	1	1	1	1
861	36	1	1	2	2	1	1	1	0	0	0	0
862	37	1	1	3	2	1	0	0	0	1	0	0
863	68	4	0	0	3	0	0	1	0	0	1	1
864	65	4	1	4	1	0	0	1	1	0	1	0
865	40	2	0	3	3	1	1	0	1	0	0	0
866	54	3	0	0	2	1	0	2	1	0	0	1
867	67	4	1	0	1	0	0	1	1	1	0	1
868	33	1	1	2	3	0	1	2	0	0	0	0
869	51	3	0	2	2	1	1	1	1	0	1	1
870	57	3	0	0	2	0	1	1	0	0	1	0
871	48	2	0	0	0	0	1	1	0	0	0	1
872	76	5	0	2	3	1	0	1	0	0	1	1
873	59	3	0	2	2	1	0	1	0	0	0	0
874	41	2	0	2	3	1	1	1	1	1	1	1
875	64	4	1	2	2	1	1	1	0	0	1	0
876	51	3	1	4	1	1	0	1	0	0	1	1
877	58	3	1	2	1	0	0	1	0	0	0	1
878	43	2	1	2	2	0	3	1	0	0	0	0
879	52	3	1	2	2	0	1	1	0	0	0	0
880	59	3	0	2	3	1	1	1	1	0	1	1
881	65	4	0	2	3	0	0	1	0	0	0	0
882	78	5	0	2	2	1	0	1	1	0	0	0
883	26	0	0	3	3	1	0	0	1	0	1	1
884	49	2	0	2	2	1	1	1	0	0	0	0
885	68	4	0	2	1	1	0	1	1	0	1	1
886	51	3	1	2	3	0	1	1	0	0	1	0
887	57	3	0	2	3	0	2	1	0	0	0	0
888	50	3	0	1	3	0	1	1	1	0	0	1
889	58	3	0	2	3	1	1	1	0	0	1	1
890	67	4	0	2	3	0	0	1	0	0	0	0
891	66	4	0	1	2	0	0	1	1	0	1	0
892	60	4	0	2	2	1	1	1	0	0	0	0
893	61	4	1	2	3	0	0	1	1	1	1	0
894	63	4	1	2	3	1	0	1	1	0	1	1
895	70	5	0	1	3	1	1	1	0	0	0	1
896	51	3	0	0	1	0	1	1	0	0	1	0
897	46	2	1	5	1	1	3	1	0	0	1	1
898	56	3	0	2	2	1	1	2	0	0	0	1
899	53	3	0	0	2	0	0	1	0	0	0	0
900	43	2	1	1	3	0	1	1	1	0	1	1
901	68	4	1	2	3	1	0	2	1	0	1	1
902	56	3	1	2	2	0	1	1	1	1	0	1
903	52	3	1	2	3	1	1	0	0	1	0	0
904	51	3	0	2	3	0	1	1	0	0	1	0
905	49	2	0	2	2	1	1	1	0	0	0	0
906	56	3	0	2	3	0	1	1	0	1	0	1
907	26	0	0	3	2	1	0	0	0	0	0	1
908	40	2	0	2	3	1	1	1	0	0	1	1
909	62	4	0	2	2	1	1	1	0	0	0	0
910	48	2	1	2	3	1	0	1	0	0	0	0
911	51	3	1	2	3	1	1	1	0	0	1	0
912	57	3	0	2	2	1	1	1	0	1	1	1
913	55	3	1	1	1	0	0	1	1	1	1	1
914	48	2	0	2	2	0	1	1	1	0	1	1
915	67	4	1	2	2	1	0	1	0	1	1	1
916	73	5	0	2	2	0	0	1	0	0	0	1
917	65	4	0	2	3	1	0	1	0	0	1	0
918	75	5	0	2	3	1	1	1	0	0	1	0
919	58	3	0	1	2	1	2	1	0	1	0	1
920	61	4	1	2	3	1	0	1	1	1	1	1
921	61	4	0	0	3	1	2	1	1	0	1	0
922	50	3	0	2	2	1	1	1	0	0	0	0
923	59	3	1	0	3	1	2	1	0	0	1	0
924	43	2	1	2	2	1	1	1	1	0	1	0
925	46	2	1	3	3	1	0	1	0	0	0	1
926	63	4	0	2	3	1	1	1	1	1	0	1
927	52	3	0	2	3	0	1	1	0	0	1	0
928	35	1	1	1	3	0	1	1	0	0	1	0
929	57	3	1	3	3	1	0	1	1	1	1	1
930	51	3	1	2	2	0	1	1	1	0	0	1
931	56	3	0	3	2	1	2	0	1	1	0	0
932	45	2	1	1	3	1	1	1	1	0	0	0
933	34	1	1	3	2	1	1	2	0	0	0	1
934	74	5	0	5	2	1	1	1	0	0	1	0
935	57	3	0	0	1	1	1	1	1	0	1	1
936	59	3	0	2	3	1	1	1	1	0	1	0
937	78	5	1	2	3	1	0	2	1	0	1	1
938	53	3	1	1	3	0	1	1	1	0	0	0
939	58	3	0	1	3	1	2	1	1	0	1	0
940	60	4	0	2	3	1	2	1	1	1	1	1
941	74	5	0	0	1	1	1	1	0	0	0	0
942	29	0	0	5	0	1	1	0	0	0	0	0
943	52	3	0	1	3	1	2	1	1	0	1	1
944	61	4	1	3	3	1	0	1	0	0	0	0
945	59	3	1	2	3	1	2	1	1	0	1	0
946	49	2	0	2	2	1	1	1	0	0	0	0
947	62	4	1	2	3	1	0	1	0	1	1	1
948	59	3	1	1	3	1	1	1	0	1	0	0
949	46	2	1	4	1	1	1	1	0	0	1	1
950	60	4	1	1	3	1	1	1	1	0	1	1
951	70	5	1	1	3	1	1	1	0	0	1	1
952	64	4	1	0	3	1	0	1	0	0	0	0
953	61	4	0	2	2	1	2	1	0	0	0	0
954	65	4	0	2	1	1	1	1	1	0	0	1
955	51	3	1	1	1	1	0	1	0	1	0	0
956	72	5	0	2	2	1	0	1	1	0	1	1
957	59	3	1	2	3	1	1	1	1	0	1	0
958	57	3	1	2	1	1	1	1	0	0	1	0
959	41	2	1	1	3	1	0	1	0	1	0	1
960	48	2	1	2	1	1	1	1	0	0	0	0
961	59	3	1	1	0	1	1	1	0	0	0	1
962	64	4	0	2	2	1	0	1	0	0	1	0
963	65	4	0	0	0	1	2	1	1	1	1	1
964	36	1	0	2	2	0	1	1	0	0	0	1
965	36	1	1	4	1	1	1	1	1	0	1	1
966	48	2	1	4	0	1	2	0	0	0	1	1
967	62	4	1	2	3	1	1	1	1	0	1	0
968	54	3	0	2	3	1	2	1	0	1	1	0
969	62	4	0	2	3	1	2	1	0	0	1	0
970	78	5	1	0	1	1	0	1	1	0	0	0
971	63	4	0	1	3	0	0	1	1	0	0	0
972	44	2	0	0	3	1	2	1	0	1	0	1
973	58	3	1	2	3	1	1	1	0	1	1	1
974	51	3	1	2	2	1	1	1	0	0	1	0
975	67	4	0	0	3	1	0	0	1	0	1	0
976	49	2	0	3	3	1	1	0	0	1	1	1
977	49	2	1	2	3	1	1	1	0	0	0	0
978	45	2	1	3	2	1	0	1	1	1	1	1
979	40	2	0	2	2	1	1	1	0	0	1	1
980	60	4	0	2	3	1	3	1	0	0	0	0
981	35	1	1	3	1	1	0	1	0	0	1	0
982	41	2	1	1	0	1	1	1	0	0	0	0
983	57	3	0	1	3	1	1	1	0	1	1	1
984	66	4	0	2	3	0	1	1	0	1	1	0
985	54	3	0	2	3	1	1	1	0	1	0	1
986	25	0	0	3	3	1	1	0	0	0	0	1
987	58	3	0	2	3	1	1	1	0	1	1	1
988	56	3	0	4	1	1	1	1	1	1	1	1
989	35	1	1	3	1	1	1	1	0	0	0	0
990	61	4	0	2	2	1	0	1	0	0	1	1
991	62	4	1	1	0	1	1	2	1	0	1	1
992	54	3	0	1	3	1	1	1	0	0	1	1
993	65	4	0	4	2	1	0	1	0	0	1	1
994	65	4	0	2	3	1	0	1	1	1	0	0
995	57	3	0	2	2	1	1	1	0	0	0	0
996	57	3	0	1	3	1	2	1	0	0	0	1
997	49	2	1	3	1	0	1	1	0	1	1	1
998	45	2	1	3	2	1	0	1	0	0	0	0
999	61	4	1	2	3	1	0	1	0	0	1	1
1000	59	3	1	2	0	0	0	1	1	1	1	1
1001	46	2	0	4	0	1	0	0	0	0	0	1
1002	55	3	1	1	3	1	1	1	1	1	0	0
1003	61	4	1	1	1	1	3	2	1	1	0	1
1004	54	3	1	2	0	1	1	1	1	0	1	1
1005	69	4	1	3	3	1	0	1	0	0	1	0
1006	57	3	0	2	3	1	0	1	1	0	0	1
1007	51	3	1	0	3	0	1	1	0	0	1	0
1008	47	2	1	1	3	1	2	1	0	0	0	0
1009	60	4	0	1	3	1	1	1	1	0	1	1
1010	52	3	0	2	1	1	1	1	1	0	0	1
1011	68	4	0	0	3	0	0	0	0	0	1	0
1012	27	0	1	3	2	1	0	0	1	0	1	1
1013	50	3	0	1	0	1	1	1	0	0	1	0
1014	56	3	0	2	3	1	1	1	0	0	1	1
1015	64	4	0	2	3	1	1	0	1	0	0	1
1016	62	4	0	0	3	1	0	1	0	1	1	1
1017	62	4	1	0	3	0	0	1	0	1	1	0
1018	54	3	0	2	1	1	1	1	0	1	0	0
1019	47	2	1	3	3	0	0	1	0	0	1	0
1020	61	4	0	2	3	1	2	1	0	0	0	0
1021	63	4	0	2	2	1	1	1	1	1	1	1
1022	65	4	1	1	0	1	1	1	0	1	1	0
1023	56	3	1	2	3	1	0	1	0	0	1	0
1024	59	3	0	2	3	1	1	1	1	0	1	1
1025	55	3	0	2	3	1	1	1	1	0	0	0
1026	60	4	0	1	3	1	0	1	1	1	1	1
1027	58	3	1	2	2	1	1	1	0	0	0	0
1028	55	3	0	2	2	1	0	1	0	1	1	1
1029	56	3	1	1	3	0	0	1	1	0	1	0
1030	49	2	0	2	2	1	1	1	0	0	1	1
1031	55	3	0	0	1	1	2	1	1	0	1	0
1032	58	3	0	1	0	1	2	1	0	1	1	1
1033	63	4	0	2	2	1	2	2	0	0	0	0
1034	51	3	1	2	3	1	0	1	0	0	1	1
1035	58	3	0	3	2	1	1	1	0	0	1	1
1036	31	1	0	3	2	0	1	0	0	1	0	1
1037	45	2	1	2	2	1	1	1	1	0	1	1
1038	62	4	0	0	3	1	1	1	0	0	0	1
1039	51	3	1	2	3	1	0	1	1	0	1	1
1040	47	2	1	2	3	0	1	1	1	0	0	1
1041	61	4	1	0	3	0	0	1	1	0	1	0
1042	57	3	1	2	2	1	1	1	0	0	0	1
1043	59	3	1	3	2	0	0	1	0	0	0	1
1044	67	4	1	2	2	0	0	1	1	0	0	1
1045	54	3	0	2	3	1	2	1	1	0	1	1
1046	66	4	0	2	3	1	1	1	1	1	1	1
1047	28	0	0	3	2	1	1	1	0	0	0	1
1048	67	4	1	0	3	1	1	1	0	0	1	1
1049	34	1	1	3	2	1	0	0	0	0	0	1
1050	63	4	1	3	3	1	0	1	1	0	1	1
1051	56	3	0	2	3	1	1	1	0	0	1	0
1052	38	1	0	3	3	1	1	1	0	0	0	1
1053	61	4	0	2	3	1	1	1	1	1	1	1
1054	62	4	0	1	1	1	2	1	1	1	1	0
1055	34	1	0	3	1	1	1	0	1	1	1	1
1056	35	1	0	2	2	1	1	1	0	0	0	1
1057	52	3	0	2	1	1	1	1	1	0	0	1
1058	56	3	0	2	2	1	2	1	1	0	1	0
1059	55	3	1	2	3	1	2	1	0	0	1	1
1060	49	2	0	3	0	1	0	0	0	0	1	1
1061	51	3	1	1	3	1	1	1	0	1	1	0
1062	61	4	1	1	3	1	0	1	1	1	1	1
1063	65	4	0	2	3	1	0	1	0	0	1	1
1064	47	2	1	2	3	1	1	1	0	1	0	1
1065	66	4	1	2	2	0	0	1	1	1	1	1
1066	23	0	0	4	1	1	1	0	0	0	0	0
1067	50	3	1	0	3	1	1	1	1	0	1	0
1068	60	4	1	1	3	1	2	1	0	0	1	0
1069	60	4	0	2	2	1	0	1	0	0	1	0
1070	70	5	0	0	2	1	2	1	1	1	0	1
1071	55	3	0	2	3	1	2	1	0	0	0	0
1072	67	4	0	2	3	1	1	1	1	0	0	1
1073	50	3	1	2	3	1	1	1	0	0	1	0
1074	64	4	1	2	3	1	0	1	1	1	0	1
1075	28	0	0	2	2	1	2	0	0	0	1	0
1076	57	3	1	2	2	0	0	1	0	0	1	0
1077	51	3	0	2	3	1	1	1	1	0	0	0
1078	60	4	0	2	3	0	0	1	0	0	1	1
1079	38	1	0	2	2	0	1	1	0	0	0	0
1080	63	4	1	2	3	1	1	1	0	1	1	1
1081	59	3	1	2	3	1	1	1	0	0	0	1
1082	54	3	1	1	3	1	2	1	1	0	1	0
1083	54	3	1	3	3	1	1	1	1	0	1	0
1084	53	3	1	3	2	1	0	1	0	0	1	1
1085	56	3	0	2	3	1	2	1	1	1	1	1
1086	56	3	1	2	2	0	0	2	0	0	0	1
1087	51	3	1	2	3	1	1	1	0	0	0	1
1088	60	4	1	1	3	1	1	1	1	0	1	0
1089	47	2	1	0	3	0	1	1	0	0	0	0
1090	28	0	1	3	3	0	0	1	0	0	0	0
1091	72	5	0	1	2	1	2	1	1	0	1	1
1092	56	3	1	2	3	1	0	1	1	1	1	1
1093	50	3	1	2	3	1	1	1	0	0	0	0
1094	61	4	1	2	2	1	0	1	1	1	1	0
1095	55	3	1	1	3	1	1	1	0	0	1	1
1096	41	2	0	1	3	1	2	1	0	0	1	0
1097	51	3	1	2	3	1	1	1	1	0	1	0
1098	74	5	0	0	3	1	2	1	1	1	1	1
1099	63	4	0	2	0	1	0	0	1	0	1	1
1100	64	4	1	0	3	1	1	1	1	0	1	1
1101	60	4	1	2	2	0	1	1	1	1	1	1
1102	65	4	0	2	3	1	1	1	1	1	1	0
1103	58	3	1	2	3	1	2	1	0	0	1	0
1104	50	3	1	2	1	1	1	1	0	0	1	0
1105	65	4	0	3	3	1	1	0	1	0	1	0
1106	62	4	0	2	3	1	1	2	1	0	1	1
1107	66	4	0	2	2	1	1	1	0	0	1	0
1108	49	2	1	1	2	1	2	1	0	0	0	0
1109	74	5	1	2	3	1	0	1	0	0	1	0
1110	73	5	1	1	3	1	2	1	1	1	0	1
1111	57	3	1	1	0	1	0	1	1	1	0	1
1112	52	3	1	2	2	1	1	1	0	0	1	0
1113	56	3	0	2	1	1	2	1	1	0	1	1
1114	67	4	0	1	0	1	0	1	1	0	1	0
1115	50	3	0	2	3	1	1	1	1	0	0	1
1116	64	4	0	2	3	1	1	1	0	0	0	1
1117	62	4	0	1	1	1	1	1	1	1	1	0
1118	56	3	0	1	3	1	1	1	1	0	1	1
1119	73	5	1	2	2	1	0	1	1	0	1	1
1120	68	4	1	2	2	1	2	1	0	0	1	0
1121	69	4	0	2	1	0	0	1	1	0	0	0
1122	59	3	1	1	0	0	0	1	0	1	0	0
1123	52	3	0	2	3	1	1	1	0	0	0	1
1124	59	3	1	2	3	1	2	1	1	0	1	0
1125	50	3	1	2	2	1	1	1	0	0	1	0
1126	51	3	1	2	2	1	0	1	1	0	1	1
1127	52	3	0	2	3	1	2	1	0	0	1	1
1128	48	2	1	2	2	1	1	1	0	0	0	0
1129	49	2	1	4	0	0	1	2	0	0	0	0
1130	51	3	1	2	3	1	1	1	0	0	0	1
1131	65	4	1	3	3	1	0	2	0	1	1	0
1132	59	3	1	0	2	1	1	1	0	0	1	0
1133	68	4	0	2	3	1	3	1	0	0	0	0
1134	72	5	1	2	3	1	1	1	1	1	1	1
1135	56	3	1	2	2	1	1	1	0	0	1	0
1136	58	3	0	2	3	1	1	1	0	0	0	0
1137	46	2	1	4	1	1	1	1	0	0	0	0
1138	48	2	0	1	3	1	1	1	0	0	1	1
1139	52	3	1	2	3	1	0	1	1	1	1	0
1140	57	3	0	2	1	0	1	1	0	0	0	1
1141	34	1	0	3	3	1	0	0	0	0	0	1
1142	71	5	1	2	3	0	0	1	0	0	1	0
1143	52	3	1	2	2	1	1	1	1	0	0	0
1144	45	2	0	5	3	0	0	0	1	0	1	0
1145	77	5	1	2	3	1	0	1	1	0	1	0
1146	57	3	0	2	2	0	2	1	1	1	0	1
1147	60	4	0	2	1	0	1	1	1	1	0	0
1148	50	3	0	2	2	1	2	1	1	0	0	0
1149	54	3	0	1	3	0	1	1	1	0	0	0
1150	64	4	0	1	0	1	1	1	0	0	0	0
1151	58	3	0	1	3	1	2	1	1	1	1	1
1152	51	3	1	2	3	1	2	1	0	0	0	1
1153	51	3	1	2	2	1	2	1	0	0	1	0
1154	68	4	0	0	2	1	1	1	1	0	0	1
1155	53	3	1	2	3	1	2	1	1	0	1	0
1156	56	3	0	2	3	1	2	1	1	1	1	1
1157	54	3	1	2	2	1	1	1	1	1	1	0
1158	66	4	0	0	1	1	2	1	0	0	1	1
1159	51	3	0	2	2	1	1	1	0	0	1	0
1160	51	3	1	4	0	0	0	1	0	1	0	1
1161	60	4	0	2	3	1	1	1	0	0	1	0
1162	54	3	1	1	2	1	0	1	1	1	1	1
1163	53	3	0	2	3	1	2	1	0	0	0	1
1164	68	4	0	0	2	1	0	1	1	1	1	1
1165	67	4	0	2	3	1	1	1	0	0	1	0
1166	55	3	1	0	0	1	1	1	1	1	1	1
1167	62	4	1	2	3	0	0	1	1	0	1	1
1168	42	2	1	1	3	1	2	1	1	1	1	0
1169	41	2	1	2	3	1	1	1	0	0	1	1
1170	60	4	0	2	3	1	1	1	0	0	1	1
1171	65	4	0	3	2	0	1	1	0	1	1	1
1172	52	3	0	4	2	1	1	2	1	0	1	1
1173	65	4	0	2	2	1	1	1	1	0	1	1
1174	65	4	0	2	2	1	1	1	0	0	0	1
1175	48	2	1	2	1	1	1	0	0	1	0	0
1176	64	4	1	1	0	1	1	1	0	1	1	0
1177	50	3	1	2	3	1	1	1	0	0	1	1
1178	65	4	1	0	2	0	1	1	1	0	1	1
1179	63	4	1	2	2	1	1	1	0	0	1	1
1180	51	3	0	2	2	1	1	1	0	0	0	1
1181	40	2	1	2	2	1	2	0	0	0	0	1
1182	54	3	1	2	3	1	1	1	0	1	1	1
1183	51	3	1	2	3	1	1	1	1	1	1	1
1184	67	4	0	2	3	1	2	1	0	0	1	1
1185	62	4	0	2	3	1	0	1	0	1	0	1
1186	27	0	1	3	2	1	0	0	0	0	1	1
1187	58	3	0	1	1	1	2	1	0	0	0	1
1188	31	1	0	3	2	1	2	0	1	0	1	1
1189	53	3	1	1	3	1	1	1	1	0	1	1
1190	55	3	0	2	3	1	1	1	1	0	0	0
1191	67	4	0	1	3	1	0	1	1	1	1	0
1192	51	3	1	2	3	1	1	1	0	0	0	0
1193	41	2	1	2	3	1	1	1	0	0	1	1
1194	61	4	1	2	3	1	0	1	0	0	0	1
1195	54	3	1	3	3	1	1	1	1	0	1	1
1196	66	4	0	1	3	0	1	1	1	0	1	0
1197	59	3	0	3	2	0	2	1	0	1	1	0
1198	58	3	1	2	3	1	1	1	0	0	0	1
1199	60	4	1	1	3	1	0	1	1	1	1	1
1200	51	3	0	2	0	1	1	1	0	0	1	0
1201	57	3	0	2	1	0	1	1	0	0	1	1
1202	62	4	0	2	3	1	1	1	1	1	0	0
1203	71	5	0	1	3	1	2	1	1	0	1	1
1204	45	2	1	2	3	1	1	1	0	0	0	1
1205	62	4	1	4	3	1	1	2	0	0	1	0
1206	62	4	0	3	2	1	0	1	0	0	1	1
1207	54	3	1	0	3	1	0	1	0	0	0	0
1208	73	5	1	1	3	0	0	1	1	0	1	1
1209	45	2	1	4	0	1	1	1	1	0	1	1
1210	68	4	1	1	1	1	1	1	1	0	1	0
1211	49	2	1	1	3	1	1	1	1	0	0	0
1212	59	3	0	2	3	0	1	1	0	0	0	1
1213	58	3	1	1	3	0	2	1	1	1	0	0
1214	56	3	1	1	3	1	1	1	1	1	1	1
1215	62	4	1	2	3	1	1	1	0	0	1	0
1216	49	2	0	3	2	1	1	2	1	0	1	0
1217	69	4	1	2	2	0	0	1	1	0	1	0
1218	33	1	0	4	0	1	1	1	1	0	1	1
1219	60	4	1	2	3	1	0	1	0	0	1	1
1220	63	4	1	1	1	1	1	1	0	0	1	1
1221	57	3	0	2	2	1	1	1	0	0	0	0
1222	54	3	0	2	2	1	1	2	1	0	1	0
1223	56	3	0	2	3	1	1	1	1	0	0	1
1224	57	3	0	0	3	1	1	2	1	0	1	1
1225	49	2	0	2	3	1	2	1	1	0	1	1
1226	52	3	1	2	2	1	1	2	1	0	1	0
1227	62	4	1	1	3	1	1	1	1	0	1	0
1228	51	3	1	1	3	1	2	1	0	0	1	0
1229	54	3	1	2	3	1	1	1	1	1	1	1
1230	54	3	0	2	3	1	1	1	0	1	1	1
1231	56	3	0	2	2	1	1	1	1	0	0	0
1232	65	4	0	2	3	1	1	2	1	0	1	1
1233	55	3	1	1	2	1	1	1	1	0	1	1
1234	62	4	1	2	3	1	1	1	0	0	1	0
1235	73	5	0	1	3	0	0	1	0	0	0	0
1236	55	3	0	2	3	1	2	2	1	1	1	1
1237	35	1	1	3	2	1	0	1	1	1	1	1
1238	58	3	1	4	2	1	1	1	1	0	1	0
1239	60	4	1	2	3	1	0	1	1	0	1	0
1240	62	4	0	2	2	1	1	1	0	0	0	1
1241	49	2	1	4	3	1	1	1	1	0	1	1
1242	73	5	0	2	2	1	1	1	1	1	1	0
1243	61	4	0	2	2	1	1	1	0	1	1	1
1244	45	2	0	0	3	1	1	1	1	1	0	0
1245	61	4	1	1	1	1	0	1	0	0	1	1
1246	58	3	0	0	3	0	1	1	1	0	1	1
1247	63	4	0	0	1	1	0	1	0	0	0	1
1248	69	4	0	2	3	1	3	1	0	0	1	0
1249	57	3	0	2	3	0	1	1	1	1	1	1
1250	58	3	0	2	3	1	0	1	0	1	1	1
1251	54	3	1	3	3	0	1	1	0	0	0	0
1252	54	3	0	3	0	1	0	0	1	0	1	1
1253	60	4	0	2	3	1	0	1	0	0	1	0
1254	59	3	1	2	3	1	0	1	0	0	0	0
1255	53	3	1	2	3	1	1	1	1	1	1	1
1256	41	2	0	2	3	1	1	1	0	0	0	0
1257	63	4	0	2	3	0	0	1	0	0	0	1
1258	47	2	0	2	3	0	1	1	0	0	1	1
1259	34	1	1	1	2	1	2	2	0	0	0	0
1260	50	3	0	3	3	1	0	0	1	1	0	0
1261	49	2	1	1	3	1	1	1	0	0	1	0
1262	47	2	1	2	0	0	1	1	1	0	1	1
1263	54	3	1	2	2	1	2	1	0	0	1	0
1264	49	2	0	3	1	0	1	1	1	0	1	0
1265	65	4	1	2	3	0	1	1	1	1	1	1
1266	56	3	0	2	1	1	1	1	0	0	0	1
1267	58	3	1	2	3	1	1	1	0	0	0	0
1268	63	4	0	0	1	1	0	0	1	0	1	1
1269	58	3	1	2	3	1	0	1	1	0	1	0
1270	62	4	1	2	0	1	0	1	0	0	0	0
1271	56	3	1	1	3	1	0	1	1	0	1	1
1272	52	3	0	2	3	1	0	1	1	0	1	1
1273	59	3	0	2	0	1	0	0	0	0	1	0
1274	66	4	0	2	3	1	0	1	1	1	0	1
1275	41	2	0	0	3	0	1	1	1	0	0	0
1276	72	5	1	0	1	1	0	1	1	1	1	0
1277	56	3	1	2	3	1	0	1	1	0	1	0
1278	46	2	1	1	3	1	1	1	0	0	0	0
1279	60	4	0	2	1	1	1	2	0	0	0	1
1280	49	2	0	2	3	1	1	1	0	0	0	0
1281	56	3	1	0	2	1	0	1	0	1	0	0
1282	43	2	0	3	3	1	1	1	0	0	1	1
1283	66	4	1	0	3	1	0	1	1	1	1	1
1284	67	4	0	2	2	1	0	1	0	1	0	0
1285	60	4	0	2	3	1	1	1	1	1	1	0
1286	58	3	0	2	3	1	0	1	0	0	0	0
1287	37	1	1	3	3	0	1	1	0	0	0	0
1288	55	3	0	2	3	1	2	1	1	0	1	0
1289	27	0	1	2	3	1	0	1	0	0	0	0
1290	71	5	0	2	3	1	0	1	1	0	0	1
1291	67	4	1	2	3	1	0	1	0	0	0	0
1292	70	5	0	2	3	0	0	1	1	0	1	1
1293	63	4	0	0	3	0	0	1	1	0	0	1
1294	62	4	1	0	3	1	0	1	0	0	0	0
1295	27	0	1	1	1	1	3	0	0	0	1	0
1296	71	5	0	2	2	1	1	1	1	1	1	1
1297	68	4	0	2	2	1	1	1	1	0	1	0
1298	60	4	1	2	3	1	0	1	1	1	1	0
1299	59	3	0	2	3	1	0	1	0	0	0	1
1300	57	3	1	1	3	1	2	1	1	0	1	1
1301	61	4	0	0	0	0	1	1	1	0	1	0
1302	56	3	0	2	3	0	2	1	1	0	0	1
1303	61	4	1	2	3	1	1	1	0	1	0	1
1304	67	4	0	2	3	1	0	2	0	0	1	1
1305	54	3	0	2	3	1	1	1	1	0	1	1
1306	60	4	1	2	3	0	0	1	1	0	0	1
1307	70	5	1	2	3	1	1	1	0	0	1	1
1308	27	0	0	3	2	1	1	0	0	0	0	0
1309	61	4	0	2	3	1	0	1	1	1	1	1
1310	54	3	0	2	3	1	2	1	1	0	0	1
1311	46	2	1	1	3	0	1	1	1	0	1	0
1312	49	2	1	1	3	0	1	1	0	0	1	0
1313	49	2	1	2	3	1	1	1	0	1	0	0
1314	63	4	1	1	3	0	0	1	0	0	0	0
1315	63	4	0	2	3	0	0	0	0	0	0	0
1316	61	4	1	3	3	1	0	1	0	1	0	0
1317	48	2	0	3	3	0	1	1	1	1	1	0
1318	39	1	1	1	3	0	1	1	0	0	0	0
1319	59	3	0	2	3	0	1	1	0	0	1	1
1320	52	3	0	2	3	1	2	1	1	1	1	1
1321	47	2	1	3	2	1	0	1	0	0	0	0
1322	79	5	0	2	1	1	0	1	1	1	1	1
1323	57	3	1	2	3	1	1	1	0	0	1	0
1324	54	3	0	1	0	1	1	1	0	0	0	0
1325	51	3	1	1	1	0	1	1	0	0	1	0
1326	28	0	0	3	2	1	0	0	0	0	1	1
1327	59	3	1	3	3	1	0	1	1	0	1	1
1328	52	3	0	2	3	1	2	1	1	1	0	1
1329	54	3	1	2	3	1	1	1	0	0	1	0
1330	35	1	1	2	3	0	1	1	0	0	0	0
1331	49	2	0	2	3	0	1	1	0	1	1	0
1332	51	3	1	2	3	0	1	1	0	0	0	0
1333	59	3	1	2	2	1	2	1	1	1	1	1
1334	49	2	1	1	3	1	0	1	1	0	1	1
1335	61	4	1	2	3	0	0	1	1	1	0	1
1336	42	2	1	2	3	1	1	1	0	1	1	1
1337	62	4	0	2	3	1	0	1	0	0	1	1
1338	57	3	0	2	3	0	1	1	0	0	0	0
1339	62	4	0	1	1	1	1	1	0	0	1	0
1340	65	4	1	1	3	1	1	1	0	0	1	0
1341	60	4	0	2	3	1	1	0	0	1	1	1
1342	59	3	1	1	3	1	0	1	1	0	1	0
1343	65	4	0	2	3	1	0	1	0	0	1	0
1344	54	3	0	2	3	0	1	1	1	0	1	1
1345	54	3	1	3	3	0	2	1	1	0	1	0
1346	64	4	0	1	3	1	1	1	0	1	0	1
1347	60	4	1	2	3	0	0	1	1	0	1	1
1348	46	2	1	1	0	1	0	1	0	0	0	1
1349	57	3	1	0	1	0	0	1	0	1	0	0
1350	50	3	0	3	3	1	0	0	1	1	1	0
1351	74	5	0	2	0	1	1	1	1	0	0	1
1352	67	4	0	2	3	1	2	1	0	1	1	0
1353	61	4	1	1	3	0	0	1	1	1	1	0
1354	49	2	1	2	3	0	0	1	0	1	0	0
1355	66	4	0	3	3	1	0	0	0	0	0	0
1356	70	5	0	2	3	1	0	1	1	0	0	0
1357	62	4	0	3	2	1	0	0	0	0	1	0
1358	71	5	0	1	1	1	1	0	0	1	0	0
1359	56	3	1	2	3	1	1	1	1	1	1	1
1360	40	2	1	2	3	1	0	1	0	0	0	0
1361	54	3	0	3	3	1	1	1	0	1	0	1
1362	44	2	1	2	3	1	1	1	0	1	1	0
1363	46	2	1	2	3	1	0	1	0	0	1	1
1364	56	3	1	1	3	1	0	1	0	0	1	0
1365	39	1	0	3	3	1	0	0	0	0	0	1
1366	65	4	1	2	3	1	0	1	1	0	1	0
1367	48	2	1	2	2	1	1	1	0	0	1	0
1368	50	3	1	3	3	1	0	1	1	1	1	1
1369	58	3	1	2	3	1	0	1	0	0	1	0
1370	45	2	1	3	1	0	0	1	1	0	1	0
1371	50	3	0	2	3	1	1	1	0	1	1	1
1372	44	2	0	2	3	1	1	1	0	0	1	0
1373	62	4	0	2	3	1	0	1	1	1	0	0
1374	49	2	1	3	3	1	0	1	1	0	0	0
1375	68	4	1	2	3	1	0	1	1	0	1	0
1376	56	3	0	2	2	1	2	1	1	1	1	1
1377	62	4	0	2	3	1	0	1	1	1	1	1
1378	73	5	0	1	3	1	0	1	0	0	0	0
1379	45	2	0	1	3	1	0	1	0	0	1	1
1380	53	3	1	1	3	0	1	1	1	1	1	1
1381	61	4	1	2	3	1	0	1	0	0	1	1
1382	47	2	0	1	3	1	0	1	0	1	1	0
1383	74	5	1	1	3	1	0	1	1	0	1	1
1384	41	2	0	1	3	1	3	1	0	0	0	0
1385	50	3	1	0	3	0	0	1	0	0	0	0
1386	46	2	1	2	3	0	1	1	0	0	1	0
1387	56	3	1	3	3	0	0	1	1	1	1	1
1388	60	4	0	2	3	1	1	1	0	1	1	1
1389	64	4	1	2	3	0	0	1	0	1	1	1
1390	48	2	1	2	2	1	1	1	0	1	0	0
1391	58	3	0	3	2	0	0	1	1	1	0	0
1392	63	4	0	2	3	1	0	2	0	0	1	0
1393	72	5	0	2	3	0	0	2	1	1	0	0
1394	61	4	0	2	3	1	0	1	1	0	0	1
1395	54	3	0	2	2	1	1	1	1	0	1	0
1396	70	5	0	2	3	1	1	1	1	1	1	1
1397	63	4	1	1	0	0	0	1	0	0	1	1
1398	66	4	1	0	1	0	0	1	1	0	0	1
1399	61	4	1	2	2	1	1	1	0	0	1	0
1400	54	3	0	2	1	1	1	1	1	1	1	0
1401	50	3	0	2	3	1	1	1	1	0	1	1
1402	49	2	1	1	3	0	0	1	0	0	1	0
1403	64	4	0	2	0	1	0	0	0	0	1	0
1404	76	5	0	2	3	1	2	1	0	0	1	0
1405	57	3	0	2	3	1	0	1	0	0	1	1
1406	51	3	1	2	3	1	1	1	0	0	1	0
1407	65	4	0	2	3	1	1	1	0	0	0	0
1408	35	1	0	1	3	0	1	1	0	0	0	0
1409	54	3	0	2	3	1	1	1	0	0	1	0
1410	65	4	0	2	3	0	1	1	1	1	0	1
1411	72	5	0	0	3	0	0	1	1	1	0	1
1412	57	3	1	2	3	0	0	2	1	0	1	1
1413	56	3	1	0	3	0	0	1	1	1	1	0
1414	28	0	1	4	1	1	3	0	0	0	1	0
1415	66	4	1	1	3	0	1	1	0	0	0	1
1416	62	4	0	3	3	0	0	2	1	1	1	0
1417	63	4	1	2	2	0	0	1	0	0	0	1
1418	75	5	0	1	0	1	0	1	0	0	1	1
1419	47	2	0	2	3	0	1	0	1	1	0	1
1420	34	1	1	4	1	0	2	1	0	0	1	1
1421	66	4	1	1	3	0	1	1	1	0	1	0
1422	62	4	0	1	3	0	1	1	1	1	1	1
1423	39	1	1	2	3	1	1	1	0	0	0	0
1424	58	3	0	2	3	0	1	1	1	0	1	0
1425	59	3	0	1	3	0	1	1	1	0	0	1
1426	59	3	0	2	2	1	0	1	0	0	1	0
1427	54	3	0	2	3	0	1	1	0	0	0	0
1428	53	3	1	2	3	0	1	1	0	0	0	0
1429	50	3	1	0	1	0	1	1	1	0	1	0
1430	49	2	1	0	3	0	1	1	0	0	1	0
1431	62	4	0	2	3	0	1	1	1	0	1	1
1432	61	4	0	2	3	0	0	1	1	1	0	0
1433	49	2	0	2	3	0	0	1	0	0	1	1
1434	62	4	0	4	0	1	0	1	0	0	1	0
1435	46	2	0	2	2	1	1	1	0	0	0	1
1436	49	2	1	1	0	0	1	1	0	0	1	0
1437	57	3	1	2	1	0	2	1	1	0	1	1
1438	50	3	0	2	2	0	0	1	0	1	1	1
1439	55	3	1	2	3	0	0	1	0	0	1	1
1440	54	3	0	3	2	1	2	1	1	1	1	1
1441	51	3	0	1	3	0	1	1	0	1	1	0
1442	51	3	0	1	3	1	2	1	0	0	0	0
1443	65	4	1	1	3	0	0	1	1	0	1	1
1444	60	4	0	0	0	1	1	1	1	0	1	0
1445	57	3	0	2	2	1	1	1	0	0	0	0
1446	44	2	1	2	3	0	1	1	0	0	0	1
1447	52	3	1	0	3	0	1	1	1	0	1	0
1448	56	3	1	1	3	0	0	1	1	1	1	0
1449	34	1	1	1	3	0	1	1	0	0	0	0
1450	61	4	0	2	2	1	0	1	1	0	0	1
1451	53	3	1	2	3	0	0	1	0	0	1	1
1452	42	2	0	2	2	1	1	1	0	0	0	1
1453	45	2	0	2	3	1	1	1	0	0	1	1
1454	65	4	1	2	3	0	0	2	1	1	1	1
1455	60	4	1	2	3	0	1	1	0	0	1	0
1456	65	4	0	2	3	0	1	1	1	0	0	1
1457	48	2	1	2	2	0	1	1	0	0	1	0
1458	42	2	0	2	3	0	1	0	0	0	0	0
1459	43	2	0	2	3	0	1	1	1	1	1	1
1460	62	4	1	3	3	0	0	1	1	0	1	1
1461	54	3	1	0	3	1	1	1	1	0	0	0
1462	36	1	1	2	3	1	3	1	0	0	0	0
1463	55	3	1	3	3	0	0	1	1	0	1	1
1464	54	3	1	3	3	0	1	1	1	0	1	1
1465	42	2	1	2	2	1	1	1	0	0	1	1
1466	63	4	0	2	3	0	0	1	1	0	0	1
1467	51	3	0	2	3	0	1	1	0	0	1	0
1468	53	3	0	3	2	0	1	1	0	0	1	1
1469	51	3	1	2	2	0	1	1	1	1	1	1
1470	81	5	0	1	0	0	0	1	0	0	1	1
1471	45	2	1	2	3	1	2	1	0	0	1	1
1472	62	4	0	2	3	1	0	1	0	0	1	1
1473	50	3	0	0	1	0	0	1	0	0	0	0
1474	50	3	0	1	0	0	2	1	1	0	1	0
1475	47	2	0	2	3	1	1	1	0	0	0	1
1476	28	0	0	1	3	1	1	0	0	0	0	1
1477	56	3	1	2	3	1	2	2	0	0	1	1
1478	59	3	0	1	3	1	0	1	0	1	1	1
1479	53	3	1	3	3	0	0	1	0	0	1	1
1480	56	3	1	2	2	0	1	1	0	0	0	0
1481	37	1	0	2	2	0	1	1	0	0	1	0
1482	62	4	0	2	3	0	1	0	0	0	0	0
1483	43	2	1	1	3	0	1	1	0	0	0	0
1484	65	4	1	1	3	0	0	1	1	0	1	1
1485	55	3	0	2	3	1	1	1	1	1	1	0
1486	54	3	0	2	2	0	1	1	0	0	1	0
1487	62	4	0	2	3	0	0	1	1	0	1	1
1488	52	3	0	0	3	0	1	1	1	0	1	1
1489	60	4	0	2	3	0	0	1	0	0	1	1
1490	34	1	1	3	3	0	0	1	0	0	0	0
1491	57	3	0	1	3	0	2	1	1	0	0	1
1492	58	3	0	2	3	0	0	1	1	1	0	0
1493	68	4	0	3	3	1	1	1	0	0	0	1
1494	57	3	1	2	2	1	3	1	1	0	1	0
1495	55	3	1	2	3	0	2	1	1	0	1	0
1496	51	3	1	1	3	0	1	1	0	0	1	0
1497	46	2	1	2	3	0	1	1	1	0	0	1
1498	51	3	1	2	3	0	0	1	1	0	0	0
1499	56	3	1	2	3	0	1	1	0	0	1	1
1500	28	0	0	3	2	0	0	0	0	0	0	0
1501	44	2	0	2	3	0	1	1	0	0	1	1
1502	60	4	1	2	3	0	0	1	0	1	0	0
1503	64	4	0	1	3	0	1	1	1	0	0	1
1504	52	3	1	3	1	0	0	1	0	0	1	1
1505	51	3	1	2	1	0	2	1	0	0	1	1
1506	58	3	1	2	3	0	0	2	1	0	0	1
1507	68	4	1	1	3	0	1	1	1	0	1	0
1508	68	4	0	2	3	0	1	2	1	1	1	0
1509	51	3	1	4	0	0	1	1	1	1	1	1
1510	59	3	1	2	1	0	0	1	0	0	1	1
1511	66	4	0	2	3	0	1	1	1	0	1	1
1512	57	3	1	2	3	0	0	1	0	0	1	0
1513	48	2	1	1	3	0	1	1	0	0	1	1
1514	36	1	1	3	2	1	0	1	0	0	1	0
1515	48	2	1	2	3	1	1	1	0	0	0	0
1516	51	3	0	2	2	0	0	1	1	1	1	0
1517	35	1	0	2	2	1	2	1	0	0	0	0
1518	42	2	1	2	3	0	1	1	0	0	0	1
1519	67	4	1	2	2	1	0	1	0	0	1	1
1520	54	3	1	1	2	0	1	1	0	0	1	0
1521	65	4	0	2	3	0	0	1	0	0	1	0
1522	70	5	0	2	3	0	1	1	0	1	0	1
1523	55	3	0	3	3	0	0	0	1	0	1	1
1524	54	3	0	2	3	1	0	2	0	0	0	0
1525	56	3	0	2	3	1	1	1	1	0	1	1
1526	60	4	0	2	3	0	1	1	0	0	1	1
1527	29	0	1	3	2	0	1	1	0	0	0	1
1528	55	3	1	1	3	0	1	1	0	1	0	0
1529	56	3	0	2	3	1	1	1	0	0	1	1
1530	59	3	0	2	1	0	1	1	1	1	1	1
1531	66	4	1	2	0	1	0	1	0	0	1	1
1532	49	2	1	1	3	0	1	1	1	1	1	0
1533	54	3	1	2	3	0	1	1	1	1	1	1
1534	48	2	1	2	2	0	0	1	1	0	1	1
1535	53	3	0	1	3	0	1	1	0	0	1	1
1536	56	3	0	2	3	0	0	1	0	0	1	0
1537	45	2	0	2	3	0	2	1	0	0	0	0
1538	56	3	0	4	0	0	0	0	0	0	0	0
1539	43	2	0	2	2	0	2	1	0	0	1	1
1540	66	4	0	0	1	0	1	1	1	1	0	1
1541	66	4	1	2	3	0	0	1	1	0	1	1
1542	46	2	0	2	3	0	1	1	0	0	0	0
1543	50	3	1	1	3	1	1	1	0	0	1	0
1544	53	3	1	2	3	1	1	1	0	0	0	0
1545	59	3	0	4	0	1	1	0	1	1	0	0
1546	64	4	1	1	3	1	0	1	0	0	1	1
1547	51	3	1	2	3	1	0	2	0	0	0	0
1548	42	2	0	2	2	0	1	1	0	0	1	1
1549	48	2	0	2	2	0	1	1	0	0	0	1
1550	57	3	0	3	3	1	0	1	1	0	1	1
1551	44	2	0	0	2	0	1	1	0	0	1	1
1552	58	3	1	0	3	1	0	1	1	1	1	1
1553	44	2	0	2	2	1	1	1	0	0	1	0
1554	54	3	1	2	3	0	1	1	1	0	0	0
1555	64	4	1	0	3	1	0	1	0	0	1	1
1556	50	3	0	2	0	1	2	1	1	0	1	1
1557	51	3	1	3	2	1	0	1	0	0	0	1
1558	54	3	1	2	3	0	0	1	1	0	0	1
1559	49	2	0	3	3	0	0	2	1	0	1	1
1560	58	3	0	3	2	1	0	2	0	0	0	0
1561	61	4	0	0	3	0	1	1	0	0	1	0
1562	61	4	1	2	3	0	0	1	0	1	1	1
1563	51	3	0	2	3	1	2	1	1	0	1	0
1564	77	5	0	2	3	0	0	1	1	0	1	0
1565	48	2	1	1	2	1	1	1	0	0	1	1
1566	63	4	0	2	3	0	0	1	0	0	1	0
1567	45	2	1	1	3	0	1	1	0	0	1	0
1568	49	2	1	0	3	0	1	1	0	0	0	0
1569	73	5	0	2	3	0	1	1	1	1	1	0
1570	58	3	1	2	3	0	0	1	0	1	0	1
1571	55	3	1	2	2	0	0	1	0	1	1	1
1572	54	3	1	1	3	1	2	1	0	0	1	1
1573	43	2	0	2	2	0	3	1	0	0	0	1
1574	56	3	0	2	3	0	1	1	1	0	1	1
1575	51	3	1	3	3	0	0	1	0	0	0	0
1576	53	3	1	2	2	0	0	1	1	1	1	0
1577	34	1	0	3	1	0	0	0	0	0	1	0
1578	55	3	1	2	2	1	1	1	0	0	0	1
1579	36	1	0	3	2	1	0	0	0	0	1	1
1580	70	5	0	0	0	1	0	1	0	0	1	1
1581	66	4	0	3	1	0	0	1	1	0	1	1
1582	62	4	0	2	2	0	0	1	1	0	0	1
1583	54	3	0	2	3	0	1	1	0	0	0	0
1584	55	3	1	3	3	0	0	1	1	1	1	0
1585	48	2	0	2	2	0	1	1	0	0	1	1
1586	32	1	1	3	2	0	0	0	0	0	0	0
1587	55	3	0	2	3	0	1	1	1	0	1	1
1588	18	0	0	0	0	1	0	0	0	0	1	1
1589	39	1	0	3	2	0	1	0	0	0	1	0
1590	53	3	0	2	2	0	1	1	0	0	1	1
1591	43	2	0	2	3	0	1	0	0	0	1	1
1592	56	3	0	0	3	0	0	1	1	0	0	0
1593	49	2	0	1	3	0	0	1	0	0	1	1
1594	34	1	1	0	3	0	0	0	0	0	1	0
1595	65	4	0	1	3	0	0	1	0	1	0	1
1596	28	0	0	1	2	0	1	0	0	0	0	0
1597	69	4	1	2	3	0	1	1	0	0	1	0
1598	64	4	0	2	3	0	0	1	1	1	1	1
1599	54	3	0	2	1	0	1	1	0	0	1	0
1600	54	3	0	2	3	0	1	1	0	0	0	0
1601	54	3	1	2	1	0	0	1	0	0	0	0
1602	52	3	0	0	3	0	1	1	1	1	1	1
1603	64	4	0	0	3	0	0	1	1	0	1	0
1604	62	4	1	0	1	1	0	2	1	1	0	1
1605	32	1	0	2	3	1	2	0	0	0	1	1
1606	36	1	1	4	2	1	2	1	0	0	0	0
1607	57	3	0	2	2	1	0	1	0	0	1	1
1608	65	4	0	1	3	1	1	1	1	0	0	0
1609	66	4	0	2	3	1	0	1	1	1	0	1
1610	57	3	1	2	0	1	0	1	0	0	1	1
1611	59	3	1	2	3	1	1	1	0	0	1	1
1612	58	3	1	1	2	1	2	1	0	0	0	0
1613	60	4	0	2	0	1	1	2	0	1	1	0
1614	55	3	0	1	3	1	2	1	1	1	0	1
1615	79	5	0	1	2	1	3	1	0	0	1	0
1616	54	3	0	1	2	1	2	1	0	0	1	1
1617	62	4	1	1	3	1	2	1	1	0	1	0
1618	58	3	0	2	3	1	1	1	1	1	1	1
1619	68	4	0	2	2	1	2	1	0	1	1	1
1620	67	4	0	2	3	1	3	1	1	0	1	1
1621	64	4	0	1	3	1	2	1	0	0	0	0
1622	58	3	0	1	0	1	1	1	1	0	1	0
1623	50	3	0	2	3	1	1	1	0	0	1	1
1624	66	4	0	2	3	1	2	1	0	0	0	0
1625	66	4	0	1	1	1	2	1	0	0	0	0
1626	56	3	0	2	3	1	2	0	0	0	0	1
1627	57	3	1	1	2	1	2	1	0	0	0	1
1628	65	4	0	0	0	1	1	1	0	0	1	0
1629	46	2	0	3	3	1	1	0	0	0	1	0
1630	64	4	0	2	1	1	1	1	1	1	1	1
1631	66	4	1	1	3	1	1	1	1	0	1	0
1632	61	4	1	2	2	1	1	1	1	0	1	1
1633	72	5	0	2	2	1	1	1	1	0	0	1
1634	49	2	1	4	1	1	1	1	1	0	1	1
1635	61	4	0	2	3	1	3	1	1	0	1	0
1636	63	4	0	2	3	1	2	1	0	0	0	0
1637	43	2	1	1	3	1	3	1	0	0	0	0
1638	62	4	1	2	3	1	1	1	1	0	1	1
1639	53	3	0	2	2	1	1	2	0	1	1	1
1640	61	4	0	0	0	1	0	1	1	0	0	0
1641	51	3	0	2	3	1	1	1	1	1	1	0
1642	33	1	1	5	0	1	1	1	0	0	0	0
1643	82	5	0	2	2	1	0	1	1	0	0	0
1644	63	4	1	2	2	1	0	1	0	1	1	1
1645	58	3	1	2	3	1	1	1	1	1	1	1
1646	60	4	0	2	1	1	0	1	1	0	1	1
1647	62	4	1	1	3	1	1	1	0	1	1	1
1648	77	5	1	2	1	1	0	1	0	0	1	0
1649	25	0	0	3	2	1	0	0	0	0	0	0
1650	66	4	1	1	3	1	1	2	1	0	1	0
1651	64	4	1	1	0	1	0	1	0	0	1	1
1652	69	4	1	1	1	1	1	1	0	0	1	0
1653	52	3	1	1	3	1	2	1	0	0	1	1
1654	64	4	1	1	0	1	0	1	0	0	1	0
1655	60	4	1	2	3	1	1	1	0	0	0	1
1656	56	3	0	2	2	1	2	1	1	0	0	0
1657	56	3	1	2	3	1	1	1	0	0	0	0
1658	59	3	1	2	2	1	2	1	1	0	1	0
1659	33	1	1	3	3	1	1	0	0	0	0	0
1660	56	3	0	2	2	1	1	1	0	0	0	0
1661	65	4	0	1	3	1	1	1	1	0	1	0
1662	62	4	1	2	0	1	1	0	0	0	1	0
1663	55	3	1	2	2	1	1	1	0	1	1	1
1664	58	3	1	2	3	1	1	1	0	0	1	0
1665	67	4	0	5	0	1	1	2	0	0	1	1
1666	66	4	1	2	2	1	3	1	0	0	1	1
1667	64	4	1	2	1	1	1	1	0	0	1	0
1668	68	4	0	1	3	1	1	1	1	0	1	1
1669	51	3	0	3	3	1	0	0	1	0	1	1
1670	65	4	1	1	2	1	0	1	1	0	1	1
1671	45	2	0	2	2	1	2	1	0	0	0	0
1672	70	5	0	2	2	1	1	1	1	0	0	0
1673	68	4	1	2	3	1	3	1	0	0	1	0
1674	42	2	0	2	2	1	1	0	0	0	1	0
1675	63	4	1	1	3	1	1	2	0	0	1	0
1676	74	5	0	2	2	1	1	1	0	0	1	1
1677	58	3	1	0	0	1	1	1	1	0	1	1
1678	57	3	0	2	1	1	2	1	1	0	1	0
1679	26	0	1	0	0	1	2	0	0	0	1	0
1680	46	2	1	2	3	1	2	1	0	0	0	1
1681	51	3	0	2	3	1	1	0	1	0	1	1
1682	58	3	0	1	2	1	1	1	1	0	1	1
1683	59	3	1	2	3	1	2	1	1	0	1	1
1684	50	3	1	0	3	1	2	1	0	0	1	0
1685	48	2	0	2	0	1	2	1	0	0	0	0
1686	69	4	0	2	1	1	1	1	1	0	1	1
1687	61	4	0	2	3	1	2	1	0	0	0	0
1688	64	4	1	2	2	1	3	1	1	0	0	1
1689	79	5	0	2	2	1	1	1	0	1	1	0
1690	59	3	0	2	3	1	1	1	0	0	1	0
1691	58	3	1	1	3	1	2	1	0	0	0	0
1692	55	3	0	2	3	1	1	0	0	0	0	0
1693	50	3	0	1	0	1	1	2	0	0	1	0
1694	56	3	1	1	3	1	2	1	0	0	0	0
1695	54	3	0	2	1	1	1	2	0	0	1	0
1696	59	3	1	2	1	1	2	1	0	0	1	0
1697	65	4	1	1	0	1	2	1	0	0	0	0
1698	58	3	1	1	3	1	1	1	1	0	0	1
1699	64	4	1	1	1	1	1	1	0	0	1	1
1700	49	2	0	2	2	1	1	1	0	0	1	0
1701	57	3	0	3	2	1	1	1	0	0	1	0
1702	63	4	0	1	0	1	1	1	1	0	0	1
1703	69	4	1	1	0	1	0	1	1	0	1	1
1704	55	3	1	1	3	1	2	1	0	0	0	0
1705	59	3	0	2	2	1	1	1	1	1	1	1
1706	60	4	1	1	3	1	1	1	1	1	0	0
1707	64	4	0	2	3	1	2	1	0	1	0	1
1708	58	3	1	2	2	1	2	1	0	0	1	0
1709	58	3	0	2	2	1	1	1	1	0	1	1
1710	53	3	1	2	2	1	2	1	1	0	1	1
1711	69	4	0	1	3	1	3	1	0	0	0	0
1712	63	4	0	2	3	1	1	1	0	1	0	0
1713	55	3	1	2	2	1	2	1	0	0	0	1
1714	66	4	0	2	2	1	1	2	1	0	0	0
1715	53	3	0	2	2	1	1	1	0	0	0	0
1716	28	0	1	2	0	1	3	1	0	0	0	1
1717	57	3	1	3	3	1	0	1	0	0	0	1
1718	48	2	0	4	1	1	3	2	0	0	1	0
1719	53	3	1	0	2	1	2	1	1	0	1	0
1720	59	3	1	0	0	1	0	1	1	0	1	0
1721	49	2	1	1	0	1	2	1	1	0	0	0
1722	66	4	0	2	2	1	1	0	0	0	1	1
1723	55	3	1	2	3	1	1	1	0	0	0	0
1724	58	3	0	1	2	1	1	1	0	0	0	1
1725	62	4	1	1	3	1	1	1	0	0	1	0
1726	64	4	1	1	3	1	1	2	0	0	1	0
1727	31	1	0	2	1	1	1	0	0	0	0	0
1728	72	5	0	2	3	1	1	2	0	1	0	0
1729	57	3	0	1	1	1	2	1	1	0	1	1
1730	55	3	0	1	3	1	2	1	1	0	0	0
1731	53	3	1	1	0	1	1	1	0	0	1	0
1732	62	4	0	0	0	1	2	1	0	0	1	0
1733	38	1	1	1	3	1	1	1	0	0	0	0
1734	62	4	0	1	3	1	1	1	1	0	0	0
1735	52	3	1	2	2	1	2	1	0	0	1	0
1736	60	4	1	4	1	1	1	0	1	1	1	1
1737	65	4	0	2	3	1	2	1	0	0	0	1
1738	25	0	1	0	3	1	3	0	0	0	0	1
1739	66	4	0	2	2	1	1	1	0	1	1	1
1740	66	4	0	2	1	1	3	1	1	1	0	1
1741	56	3	1	2	2	1	1	1	0	1	1	0
1742	44	2	1	1	3	1	3	1	0	0	1	0
1743	55	3	1	2	2	1	1	1	0	0	0	1
1744	86	5	1	2	3	1	1	1	1	0	1	1
1745	67	4	1	0	3	1	1	0	1	1	1	0
1746	58	3	1	1	3	1	3	0	0	0	1	0
1747	58	3	1	1	0	1	2	1	0	1	1	1
1748	60	4	0	1	3	1	1	1	1	0	0	0
1749	57	3	0	2	2	1	2	1	1	0	1	1
1750	61	4	0	1	1	1	1	1	0	0	1	1
1751	65	4	1	1	3	1	0	2	1	0	1	1
1752	61	4	1	1	3	1	1	1	1	0	0	0
1753	49	2	1	2	0	1	1	1	1	0	1	1
1754	72	5	1	1	3	1	1	1	1	0	0	0
1755	58	3	0	2	2	1	1	1	0	0	0	0
1756	58	3	1	2	0	1	2	0	1	0	1	1
1757	47	2	0	2	1	1	3	1	0	0	0	1
1758	51	3	1	2	2	1	2	1	0	0	0	0
1759	61	4	1	1	1	1	0	1	0	0	1	1
1760	62	4	1	1	2	1	1	1	0	0	1	0
1761	63	4	0	2	3	1	1	0	1	1	1	0
1762	39	1	1	3	3	1	0	0	0	1	1	0
1763	60	4	0	2	3	1	1	1	0	0	1	0
1764	57	3	1	1	3	1	2	2	0	1	1	1
1765	66	4	1	0	2	1	2	1	1	0	0	0
1766	68	4	1	5	1	1	1	1	0	0	0	0
1767	62	4	0	1	3	1	1	1	1	0	0	0
1768	56	3	0	2	2	1	1	1	0	0	1	1
1769	26	0	1	2	2	1	2	1	0	0	0	1
1770	63	4	0	2	2	1	2	0	0	0	0	0
1771	59	3	1	2	2	1	1	2	0	0	1	0
1772	66	4	0	1	3	1	2	1	1	0	1	1
1773	50	3	1	1	3	1	2	1	0	1	1	1
1774	58	3	1	1	3	1	1	1	1	0	1	1
1775	57	3	0	1	3	1	2	1	0	0	1	1
1776	66	4	0	2	2	1	1	1	1	0	1	1
1777	65	4	0	0	3	1	1	1	0	0	0	0
1778	65	4	0	2	1	1	2	1	1	1	0	1
1779	58	3	0	0	1	1	2	1	1	0	0	0
1780	66	4	0	1	1	1	1	1	1	1	1	0
1781	58	3	1	2	3	1	2	1	1	0	0	1
1782	48	2	0	2	3	1	1	1	1	1	1	1
1783	49	2	1	2	2	1	3	1	0	0	1	1
1784	58	3	1	0	0	1	1	1	0	0	1	0
1785	71	5	0	1	3	1	2	1	1	0	1	0
1786	59	3	1	1	0	1	2	1	0	0	1	0
1787	70	5	1	2	2	1	1	1	0	0	1	1
1788	32	1	0	3	2	1	0	0	0	0	0	1
1789	45	2	0	1	3	1	1	1	1	1	0	0
1790	45	2	0	3	3	1	0	1	0	1	0	1
1791	53	3	0	2	0	1	1	2	0	0	0	0
1792	68	4	1	2	2	1	2	1	1	1	1	1
1793	63	4	0	2	3	1	0	1	0	0	1	0
1794	47	2	1	2	2	1	1	1	0	0	1	0
1795	49	2	0	2	1	1	2	1	0	0	1	0
1796	63	4	0	2	3	0	1	1	1	1	1	1
1797	68	4	0	0	0	1	0	0	0	0	1	0
1798	66	4	0	2	3	0	1	1	1	0	1	0
1799	52	3	1	1	3	1	2	2	0	1	1	0
1800	50	3	0	0	0	1	1	1	1	1	0	1
1801	50	3	0	1	3	1	1	2	0	1	0	1
1802	28	0	0	3	3	1	2	0	0	0	0	0
1803	21	0	0	0	0	1	1	0	0	0	1	0
1804	67	4	0	0	1	1	1	1	1	0	0	0
1805	53	3	0	0	3	1	1	1	1	0	1	0
1806	38	1	1	2	2	1	1	1	0	0	1	0
1807	55	3	1	2	3	1	2	1	1	0	1	1
1808	62	4	0	2	2	1	1	1	1	1	1	1
1809	60	4	0	2	2	1	1	1	1	0	0	0
1810	57	3	1	2	2	1	2	1	0	0	1	0
1811	49	2	1	1	1	1	1	1	1	0	1	1
1812	67	4	0	2	2	1	2	1	1	0	1	1
1813	68	4	0	2	3	1	1	1	1	1	1	1
1814	27	0	0	2	2	1	1	0	0	0	1	0
1815	49	2	1	2	3	1	1	1	0	1	0	1
1816	45	2	0	2	2	1	2	0	0	0	1	1
1817	59	3	0	2	3	1	0	1	0	0	0	0
1818	34	1	0	1	3	1	1	1	0	0	0	0
1819	58	3	0	1	2	0	1	1	0	0	0	0
1820	47	2	1	0	3	1	1	1	0	0	0	0
1821	60	4	1	2	2	1	1	1	0	0	1	1
1822	79	5	0	2	2	1	0	1	0	0	0	0
1823	49	2	1	2	2	1	2	1	0	0	0	0
1824	47	2	1	2	1	1	1	1	0	0	0	0
1825	65	4	0	2	0	1	1	0	1	0	1	0
1826	61	4	1	2	3	1	1	1	0	0	1	1
1827	52	3	0	2	3	1	2	2	0	1	1	1
1828	51	3	0	3	3	1	1	1	0	0	1	0
1829	61	4	1	1	2	1	0	1	1	0	1	0
1830	78	5	0	2	2	1	1	1	0	0	1	0
1831	64	4	0	2	2	1	0	2	1	0	1	1
1832	58	3	0	2	2	1	2	1	0	0	0	0
1833	31	1	0	3	3	1	1	1	0	0	0	0
1834	46	2	1	4	1	0	0	1	1	0	0	0
1835	73	5	0	2	3	1	0	1	1	1	1	1
1836	42	2	1	2	3	0	1	1	0	0	0	1
1837	59	3	0	1	3	1	1	0	1	1	1	1
1838	57	3	0	0	1	1	1	1	0	0	0	1
1839	54	3	0	1	1	1	1	1	0	0	1	0
1840	48	2	1	0	0	1	2	1	0	0	1	0
1841	70	5	0	1	3	1	1	1	0	0	0	1
1842	63	4	1	2	2	1	1	1	0	0	1	0
1843	61	4	1	2	2	1	2	1	0	0	0	1
1844	57	3	1	1	3	1	1	2	0	0	1	1
1845	59	3	0	1	3	1	1	1	1	0	0	1
1846	50	3	0	2	2	1	1	1	1	0	0	0
1847	30	1	0	0	2	1	2	1	0	0	1	1
1848	54	3	1	2	2	1	2	1	1	0	0	0
1849	56	3	1	3	3	1	1	1	0	0	1	1
1850	59	3	0	5	0	1	1	2	1	0	1	1
1851	62	4	0	3	3	1	1	1	1	0	1	0
1852	48	2	1	0	3	1	1	1	1	0	1	0
1853	56	3	1	2	3	1	1	2	1	0	1	0
1854	71	5	1	2	3	1	0	1	1	1	1	1
1855	55	3	1	1	3	1	1	1	1	0	1	1
1856	73	5	1	2	2	1	2	1	1	1	1	1
1857	67	4	0	2	2	1	0	1	1	1	0	1
1858	62	4	1	1	3	1	0	1	1	1	0	1
1859	57	3	1	1	1	1	3	1	0	0	1	1
1860	54	3	0	0	2	1	1	1	0	1	1	1
1861	61	4	0	2	1	1	1	1	1	1	1	1
1862	66	4	1	2	3	1	1	1	0	0	1	1
1863	52	3	0	2	3	1	1	1	1	0	0	0
1864	58	3	0	3	3	0	1	1	1	0	0	0
1865	56	3	0	2	2	1	1	1	0	1	0	1
1866	46	2	1	3	2	1	0	1	1	0	0	0
1867	42	2	1	4	1	1	1	1	0	1	0	0
1868	66	4	0	2	3	1	0	1	1	1	1	1
1869	62	4	1	1	2	1	1	1	0	0	1	0
1870	62	4	0	4	3	1	1	2	1	0	1	1
1871	61	4	0	2	3	1	1	1	0	0	1	0
1872	62	4	1	0	0	0	1	1	1	0	1	0
1873	69	4	1	1	3	1	0	2	1	1	0	1
1874	64	4	1	2	3	1	0	1	1	1	1	1
1875	60	4	0	2	3	1	1	1	1	0	1	1
1876	46	2	0	0	3	1	2	1	1	0	1	1
1877	61	4	1	2	1	1	1	1	0	0	1	0
1878	53	3	0	2	2	0	1	1	1	0	0	1
1879	79	5	0	2	1	1	1	2	1	0	0	0
1880	54	3	0	3	3	1	1	0	1	0	0	0
1881	64	4	0	2	2	1	1	1	1	0	0	0
1882	58	3	0	2	3	0	1	1	1	0	0	1
1883	63	4	0	2	3	0	1	1	0	1	0	0
1884	55	3	1	2	0	1	1	1	1	0	1	1
1885	72	5	0	2	1	1	1	1	0	0	1	0
1886	58	3	0	1	3	0	1	1	1	0	1	1
1887	66	4	1	1	3	0	0	1	1	0	0	0
1888	67	4	1	1	3	1	1	1	0	0	0	0
1889	57	3	1	3	3	1	0	1	1	0	1	0
1890	61	4	1	2	1	1	2	1	1	0	1	0
1891	62	4	0	0	3	1	1	1	0	0	0	0
1892	37	1	1	2	1	1	2	1	0	0	0	0
1893	55	3	0	1	3	1	2	2	0	1	1	1
1894	53	3	1	0	3	1	2	1	0	0	0	1
1895	61	4	1	1	3	1	2	1	0	0	1	1
1896	60	4	1	0	1	1	2	1	1	1	1	1
1897	68	4	0	2	3	1	1	1	1	0	1	1
1898	57	3	0	2	3	1	1	1	1	0	1	1
1899	50	3	0	2	3	1	1	1	1	0	1	1
1900	63	4	0	2	1	1	1	1	1	1	1	1
1901	62	4	0	2	2	1	2	1	0	0	1	0
1902	75	5	0	1	3	1	2	1	0	1	0	0
1903	45	2	1	2	3	1	1	1	1	1	1	1
1904	61	4	0	2	2	1	0	2	0	0	1	0
1905	52	3	1	2	2	1	2	1	0	0	1	1
1906	57	3	1	2	3	1	1	1	0	0	0	1
1907	59	3	1	2	2	1	2	1	1	0	1	1
1908	61	4	0	3	2	1	1	1	0	0	0	1
1909	62	4	1	1	2	1	1	1	1	1	1	1
1910	38	1	0	0	3	1	1	0	0	0	0	0
1911	59	3	0	2	1	1	1	1	0	1	0	1
1912	70	5	0	2	3	1	1	1	0	0	1	1
1913	62	4	0	3	3	1	0	1	1	0	1	0
1914	51	3	0	2	3	1	1	1	1	1	1	1
1915	59	3	0	2	3	1	1	1	0	0	1	0
1916	66	4	1	2	3	1	0	1	1	1	0	1
1917	59	3	1	1	3	1	3	1	0	0	1	0
1918	56	3	0	2	3	1	0	1	1	1	1	1
1919	44	2	1	2	2	1	2	1	0	0	0	0
1920	62	4	0	1	0	1	1	1	0	0	1	0
1921	44	2	1	2	2	0	1	1	1	1	1	1
1922	61	4	1	2	1	1	0	1	0	0	1	0
1923	55	3	0	4	1	1	1	1	1	1	1	1
1924	71	5	1	2	3	1	0	1	1	1	1	1
1925	63	4	0	2	3	0	1	1	0	0	0	1
1926	48	2	0	2	2	1	1	1	0	1	0	1
1927	56	3	0	2	2	1	2	1	0	0	0	0
1928	57	3	1	0	0	1	1	1	0	1	1	1
1929	70	5	0	1	3	1	0	1	1	1	0	1
1930	49	2	1	0	1	1	1	1	1	0	0	1
1931	66	4	0	2	3	1	1	1	1	1	0	0
1932	57	3	1	0	3	0	1	1	1	0	0	1
1933	37	1	0	3	2	1	0	0	0	0	1	0
1934	63	4	1	2	2	1	1	1	0	0	1	0
1935	45	2	1	1	3	1	2	1	1	0	0	0
1936	57	3	1	2	2	1	0	1	0	0	0	1
1937	75	5	0	2	1	1	3	1	0	0	1	1
1938	55	3	0	1	3	1	1	1	0	0	1	1
1939	65	4	0	2	1	1	0	1	1	0	1	0
1940	56	3	1	1	1	1	2	1	0	0	0	0
1941	29	0	1	2	2	1	2	0	0	0	0	0
1942	51	3	0	2	2	1	2	0	1	0	0	0
1943	48	2	0	0	1	0	1	1	1	0	1	0
1944	65	4	0	0	2	1	1	1	0	0	0	1
1945	73	5	0	2	2	1	3	2	0	0	1	0
1946	34	1	0	1	3	1	2	1	0	0	1	0
1947	56	3	0	2	3	1	2	1	1	0	1	1
1948	64	4	0	1	2	1	1	1	1	1	1	1
1949	64	4	0	0	0	1	1	1	0	0	1	0
1950	34	1	0	2	3	1	3	0	0	0	0	0
1951	55	3	0	2	3	1	1	1	1	1	1	1
1952	59	3	0	3	3	1	1	1	0	1	0	0
1953	65	4	1	1	1	1	0	2	1	0	1	1
1954	63	4	1	2	3	1	0	1	1	1	0	1
1955	26	0	0	3	3	1	1	0	1	1	0	1
1956	49	2	0	3	2	1	1	1	1	1	1	0
1957	54	3	1	3	3	1	1	1	1	1	0	1
1958	67	4	0	2	3	1	2	1	1	0	0	1
1959	60	4	0	1	3	1	1	1	0	0	0	0
1960	55	3	1	2	3	1	1	1	0	0	0	0
1961	58	3	0	2	3	1	1	1	0	0	1	1
1962	53	3	1	1	3	1	2	1	1	0	1	0
1963	55	3	0	2	3	1	2	1	1	0	1	1
1964	64	4	0	1	3	1	1	1	0	1	0	0
1965	65	4	0	2	3	1	1	1	1	1	0	1
1966	56	3	1	2	2	1	2	1	0	1	1	1
1967	48	2	0	2	3	1	1	1	0	0	0	0
1968	55	3	1	1	3	1	1	1	0	0	1	0
1969	55	3	1	2	3	1	1	1	0	0	1	0
1970	59	3	1	2	2	1	2	1	1	0	1	1
1971	81	5	1	1	0	1	1	2	1	1	0	1
1972	59	3	0	1	3	1	2	1	1	1	1	1
1973	69	4	0	2	2	1	1	1	1	0	0	1
1974	49	2	1	1	1	1	2	1	1	0	1	1
1975	37	1	0	3	2	1	1	0	1	1	1	1
1976	63	4	0	2	3	1	1	2	0	1	1	0
1977	65	4	0	0	2	1	0	1	1	0	1	1
1978	31	1	1	3	2	1	1	1	0	0	0	0
1979	33	1	0	3	1	0	0	0	0	0	0	0
1980	51	3	0	4	1	0	1	1	1	1	0	1
1981	60	4	0	2	2	1	1	1	1	0	1	1
1982	29	0	1	4	1	0	1	1	0	0	1	1
1983	60	4	1	1	3	1	2	1	0	0	1	0
1984	29	0	1	3	2	1	0	0	0	0	0	1
1985	55	3	0	0	0	0	0	1	1	1	1	0
1986	50	3	1	2	3	0	1	1	0	0	1	0
1987	35	1	1	3	3	0	0	1	0	0	1	1
1988	44	2	0	3	2	1	1	0	0	0	1	0
1989	58	3	0	2	3	1	1	1	0	0	1	1
1990	52	3	0	1	3	1	2	1	0	0	0	0
1991	49	2	1	2	1	1	2	0	0	0	1	0
1992	55	3	0	1	3	1	1	1	1	1	0	1
1993	62	4	0	5	0	1	0	1	0	0	1	1
1994	50	3	0	1	3	1	1	1	1	1	1	0
1995	50	3	1	4	1	1	1	0	0	0	1	1
1996	57	3	0	1	3	1	2	1	1	0	0	1
1997	50	3	0	4	1	1	1	1	1	0	1	1
1998	56	3	0	2	3	1	2	1	1	0	0	1
1999	62	4	1	2	3	1	1	1	1	0	1	1
[truncated: 42,897 more rows]
